# Supplementary material for: Structural basis for human TRPC5 channel inhibition by two distinct inhibitors
Source: eLife journal article supplement (doi:10.7554/elife.63429), 2021-03-08
Supplement: supp [file elife-63429-supp-v1.zip]

Archive with 21 entries (21 files):
- elife_poa_e63429_Figure_1_figure_supplement_1.pdf
- elife_poa_e63429_Figure_1_figure_supplement_2.pdf
- elife_poa_e63429_Figure_1_figure_supplement_3.pdf
- elife_poa_e63429_Figure_1_figure_supplement_4.pdf
- elife_poa_e63429_Figure_1_figure_supplement_5.pdf
- elife_poa_e63429_Figure_1_figure_supplement_6.pdf
- elife_poa_e63429_Figure_1_figure_supplement_7.pdf
- elife_poa_e63429_Figure_2_figure_supplement_1.pdf
- elife_poa_e63429_Figure_2_figure_supplement_1_continued.pdf
- elife_poa_e63429_Figure_2_figure_supplement_2.pdf
- elife_poa_e63429_Figure_4_figure_supplement_1.pdf
- elife_poa_e63429_Figure_4_figure_supplement_2.pdf
- elife_poa_e63429_Figure_4_figure_supplement_3.pdf
- elife_poa_e63429_Figure_6_figure_supplement_1.pdf
- elife_poa_e63429_Figure_6_figure_supplement_2.pdf
- elife_poa_e63429_Figure_2_figure_supplement_2_source_data_1.xlsx
- elife_poa_e63429_Figure_2_figure_supplement_2_source_data_2.xlsx
- elife_poa_e63429_Figure_1_source_data_1.xlsx
- elife_poa_e63429_Figure_2_source_data_1.xlsx
- elife_poa_e63429_Figure_3_source_data_1.xlsx
- elife_poa_e63429_Transparent_Reporting_File.docx
