# Supplementary material for: Structural basis for human TRPC5 channel inhibition by two distinct inhibitors
Source: eLife journal article supplement (doi:10.7554/elife.63429), 2021-03-08
Supplement: supp [file elife-63429-supp-v1.zip › elife_poa_e63429_Figure_1_source_data_1.xlsx]

## Sheet: Sheet1
Figure 1-Source Data 1 inhibition of WT hTRPC5 by clemizole or by HC-070
Clemizole (μM)	WT
0.200195	76.4139	79.9542	73.9707
0.400391	90.0794	69.0919	90.674
0.800781	72.6354	77.1142	70.5835
1.60156	70.4929	61.8601	64.8563
3.20312	21.7965	53.6006	53.8938
6.40625	-15.6319	25.7801	35.4249
12.8125	-18.562	19.0832	23.7269
25.625	-7.06315	11.4133	17.6214
51.25	-12.97	12.1495	16.8341
102.5	-10.7952	28.8991	17.4046
HC-070 (nM)	WT
3.90625	89.9261	81.4015	87.2766
7.8125	94.7894	80.606	83.5656
15.625	98.9581	85.7804	90.2729
31.25	95.1511	70.773	103.42
62.5	64.3	57.1587	100.339
125	60.7011	42.3908	81.6732
250	43.2146	34.3143	59.7265
500	15.3658	19.5574	25.2375
1000	19.2141	28.5179	5.31626
2000	20.1644	8.47428	-3.5573
