# Supplementary material for: Structural basis for human TRPC5 channel inhibition by two distinct inhibitors
Source: eLife journal article supplement (doi:10.7554/elife.63429), 2021-03-08
Supplement: supp [file elife-63429-supp-v1.zip › elife_poa_e63429_Figure_2_figure_supplement_2_source_data_1.xlsx]

## Sheet: Sheet1
Figure 2-figure supplement 2-Source Data 1 Activation of hTRPC5 mutants by 14 mM Ca2+ normalized to wild type channel
WT	empty vector	E418Q-E421Q-D439N	C176A-C178A-C181A	F414M	M442A	N443L	L496A	L496M	S495A	S495Y	R557A	Q573A	F569A	L572A	C525A	L528F	L528A	T603A	F576A	W577A	T607A	F599A	F599N
100	-9.52098	-0.40528	150.482	166.098	3.78209	85.4456	32.4306	41.2266	100.773	46.9888	143.191	110.87	178.853	174.636	258.428	20.5974	58.6651	198.28	61.3619	15.2067	238.902	142.076	152.361
100	0.741785	13.2077	108.544	144.015	21.9678	84.5248	42.9127	53.027	88.9176	58.8734	106.383	59.8929	87.2236	79.2108	99.3747	15.8353	34.8914	81.6503	26.7447	12.0698	83.3945	82.2999	80.7223
100	-1.18131	9.94284	95.9518	124.452	12.8589	62.6846	29.8877	44.6635	66.1948	32.6447	102.596	88.2566	113.82	117.045	183.54	14.9834	37.866	121.996	26.0898	13.3449	81.3727	99.2532	125.482
