# Supplementary material for: Structural basis for human TRPC5 channel inhibition by two distinct inhibitors
Source: eLife journal article supplement (doi:10.7554/elife.63429), 2021-03-08
Supplement: supp [file elife-63429-supp-v1.zip › elife_poa_e63429_Figure_2_figure_supplement_2_source_data_2.xlsx]

## Sheet: Sheet1
Figure 2-figure supplement 2-Source Data 2 Activation of hTRPC5 mutants by extracellular Ca2+ normalized to wild type channel
Ca2+ (mM)	WT			pcDNA3.1 vector			F414M			N443L			S495A			C525A			R557A			F569A			L572A			Q573A			F599A			F599N			T603A			T607A			E418Q-E421Q-D439N			C176A-C178A-C181A
2	3.60985	0.479576	4.53989	4.39853	4.29656	8.03741	1.22764	2.02778	4.54063	3.25754	2.7128	2.90103	2.7121	6.99625	-1.68514	5.74747	-5.3952	4.72934	3.17451	8.05234	-0.63102	5.7223	5.44018	6.64263	5.75103	3.49914	6.53785	4.83055	-0.27384	4.90986	4.82179	8.43721	5.32002	3.3618	6.74505	13.5944	2.21228	1.92326	9.1271	3.42912	6.93991	6.55333	4.57594	5.92976	9.15597	2.6582	-0.42032	3.01831
6.14815	36.5347	35.2439	44.8344	4.82605	7.21326	8.79478	24.0615	21.0124	31.8678	8.5471	12.3558	14.7574	32.4243	31.4826	12.7595	32.3829	22.4315	35.4287	33.2741	39.1219	30.9827	26.921	18.9792	28.0363	45.2769	38.6136	55.5119	15.8861	6.72076	18.4402	25.8741	22.7398	37.6021	37.1172	27.356	55.7603	35.6632	25.7287	39.8017	14.5957	13.9413	15.9979	7.02034	9.75995	7.67636	30.3203	50.6278	44.3486
8.22222	40.8747	39.4823	51.075	6.16	6.26838	9.86542	32.0298	28.2452	40.2993	16.1794	12.007	21.018	43.3382	34.5141	14.6774	57.3531	25.7572	51.3588	53.0084	50.1811	36.6014	43.2515	23.4808	41.6333	64.3178	44.4084	73.0498	35.3135	10.3285	26.174	34.755	29.6111	50.0909	43.7974	35.2373	61.2906	40.7424	32.4297	52.5654	18.2541	17.8762	26.7958	7.49396	8.37183	12.5532	49.4027	62.2179	72.748
11.3333	44.4558	52.2978	60.7087	5.12398	4.59555	8.52005	50.1961	38.9731	52.5956	23.357	17.7411	27.991	53.3857	41.0239	20.2626	89.5405	40.0453	73.1289	57.5966	56.9195	39.5913	59.336	30.8528	55.7971	82.319	52.3709	78.736	52.7346	22.6766	35.8619	51.9188	30.31	59.2132	54.6367	43.0996	84.4254	45.7586	43.4123	70.9886	28.9837	20.598	37.5712	5.48253	8.38728	9.4877	44.9825	69.4894	71.5943
16	63.4153	64.3121	68.4966	6.62754	6.26965	7.38734	63.6833	57.0888	66.5468	29.5111	26.2536	39.7572	63.6575	51.6026	24.2798	106.032	51.7075	92.5947	63.6597	69.4539	45.3727	71.602	36.1402	64.2769	103.608	59.9627	104.122	64.4634	27.4138	43.6414	58.227	42.9364	84.9875	55.186	48.2799	101.277	62.4871	46.4932	92.3323	39.9348	30.5049	55.5549	8.60416	11.6567	12.3959	60.5943	83.4002	88.6806
23	75.7446	67.7209	59.5451	5.60904	6.52988	6.85857	66.7494	58.9551	73.5018	28.9673	29.5701	35.8884	70.4038	71.291	25.1022	109.915	58.7523	102.206	66.1017	82.7133	43.9075	79.5587	41.6067	67.0085	106.491	64.5321	104.296	66.2646	34.612	39.4868	57.7656	49.2514	87.2821	50.8343	51.211	101.4	72.6204	49.0524	102.657	52.0661	39.1851	60.3283	10.2027	11.2157	9.76377	71.1809	78.5568	84.3913
33.5	81.6422	81.429	73.1866	6.57893	6.73757	7.32469	82.9097	70.7079	96.1309	43.3817	36.1368	56.5268	84.5165	87.064	35.7976	129.169	84.8029	126.347	82.075	99.3774	52.3908	101.174	58.2801	82.089	124.351	76.8894	123.109	67.7518	43.8074	54.0262	64.8708	54.4975	115.505	55.6151	60.3141	118.517	83.5379	65.1948	120.609	73.7711	58.3448	105.578	11.0549	13.8771	17.4535	73.0015	87.6578	90.1438
49.25	100	100	100	7.12081	9.93305	10.7667	84.8775	82.8007	109.811	58.9347	45.603	67.0167	85.2278	89.7471	49.7803	138.042	86.5909	143.138	95.5693	103.061	63.3913	112.482	61.8444	90.8538	133.319	89.5272	129.299	69.9132	44.6609	56.5478	69.7525	63.865	105.865	59.2496	67.0858	104.425	96.6815	83.7949	139.853	86.5958	77.0867	126.256	13.6117	18.5841	18.8543	75.8623	98.3903	108.151
