# Supplementary material for: Structural basis for human TRPC5 channel inhibition by two distinct inhibitors
Source: eLife journal article supplement (doi:10.7554/elife.63429), 2021-03-08
Supplement: supp [file elife-63429-supp-v1.zip › elife_poa_e63429_Figure_2_source_data_1.xlsx]

## Sheet: Sheet1
Figure 2-Source Data 1 Inhibitory effect of CMZ on various hTRPC5 mutants
Clemizole (μM)	WT			F414M			N443L			S495A
0.200195	76.4139	79.9542	73.9707	130.362	136.41	130.162	8.2859	61.9116	69.2068	83.0286	72.8705	82.4489
0.400391	90.0794	69.0919	90.674	115.757	131.387	126.484	89.4544	75.0901	69.8704	78.3648	69.1733	87.9153
0.800781	72.6354	77.1142	70.5835	107.413	108.056	106.324	64.5572	80.4226	72.9321	82.0098	64.3336	65.9939
1.60156	70.4929	61.8601	64.8563	59.1204	101.929	98.3676	37.1154	73.1757	65.2694	79.3397	60.8628	64.1766
3.20312	21.7965	53.6006	53.8938	44.652	61.2472	76.2156	56.3432	66.0762	60.5012	50.6142	51.4268	51.6568
6.40625	-15.6319	25.7801	35.4249	32.0756	27.8824	36.0691	52.8065	64.064	49.734	46.5027	43.6277	40.7799
12.8125	-18.562	19.0832	23.7269	22.4409	14.4333	8.86976	14.7304	49.4814	34.1307	40.3088	32.5106	24.324
25.625	-7.06315	11.4133	17.6214	23.1866	10.4577	14.4317	12.115	34.5968	31.949	43.7301	39.4276	13.6266
51.25	-12.97	12.1495	16.8341	29.5291	7.84632	15.168	2.6792	26.9465	21.2602	36.4	53.9592	28.8707
102.5	-10.7952	28.8991	17.4046	7.36683	29.2976	5.39699	3.74902	29.2093	20.7643	11.0881	19.7228	24.7711
