# Supplementary material for: Structural basis for human TRPC5 channel inhibition by two distinct inhibitors
Source: eLife journal article supplement (doi:10.7554/elife.63429), 2021-03-08
Supplement: supp [file elife-63429-supp-v1.zip › elife_poa_e63429_Figure_3_source_data_1.xlsx]

## Sheet: Sheet1
Figure 3-Source Data 1 Inhibitory effect of HC-070 on various hTRPC5 mutants
HC-070 (nM)	WT			C525A			R557A			F569A			L572A
3.90625	89.9261	81.4015	87.2766	155.551	197.126	180.025	114.69	121.098	115.853	133.417	153.025	150.215	112.678	135.135	113.901
7.8125	94.7894	80.606	83.5656	141.219	196.414	191.98	124.248	128.525	115.265	140.632	145.601	144.915	124.456	139.169	110.503
15.625	98.9581	85.7804	90.2729	147.599	192.636	188.509	113.195	111.694	127.942	144.82	143.862	154.067	130.182	152.127	119.181
31.25	95.1511	70.773	103.42	110.251	175.778	143.82	125.675	100.306	128.112	138.452	137.35	149.399	126.487	156.98	110.186
62.5	64.3	57.1587	100.339	99.9155	160.379	134.02	104.305	128.253	115.115	148.341	147.6	126.707	115.123	151.594	105.918
125	60.7011	42.3908	81.6732	80.034	146.5	74.3155	90.5077	108.477	85.2321	108.52	129.626	124.204	105.981	146.783	99.3532
250	43.2146	34.3143	59.7265	37.2882	113.504	52.7067	60.2343	80.9615	67.6908	97.6818	126.979	107.153	94.1668	131.936	79.0637
500	15.3658	19.5574	25.2375	22.3153	56.5255	26.8684	35.9656	49.9052	34.8539	67.8859	103.279	66.3325	59.005	96.7381	59.2288
1000	19.2141	28.5179	5.31626	25.449	12.2698	30.7055	33.9733	7.63351	20.9764	30.9642	44.2602	40.0019	42.4557	58.7404	33.3169
2000	20.1644	8.47428	-3.5573	13.3427	4.22103	12.2004	8.8345	-14.4935	13.6337	8.70555	3.47817	18.8644	16.9383	26.5364	22.3679
