# Supplementary figures and images for: Structural basis for human TRPC5 channel inhibition by two distinct inhibitors
Source: eLife journal article supplement (doi:10.7554/elife.63429), 2021-03-08

**Figure 4-figure supplement 3**

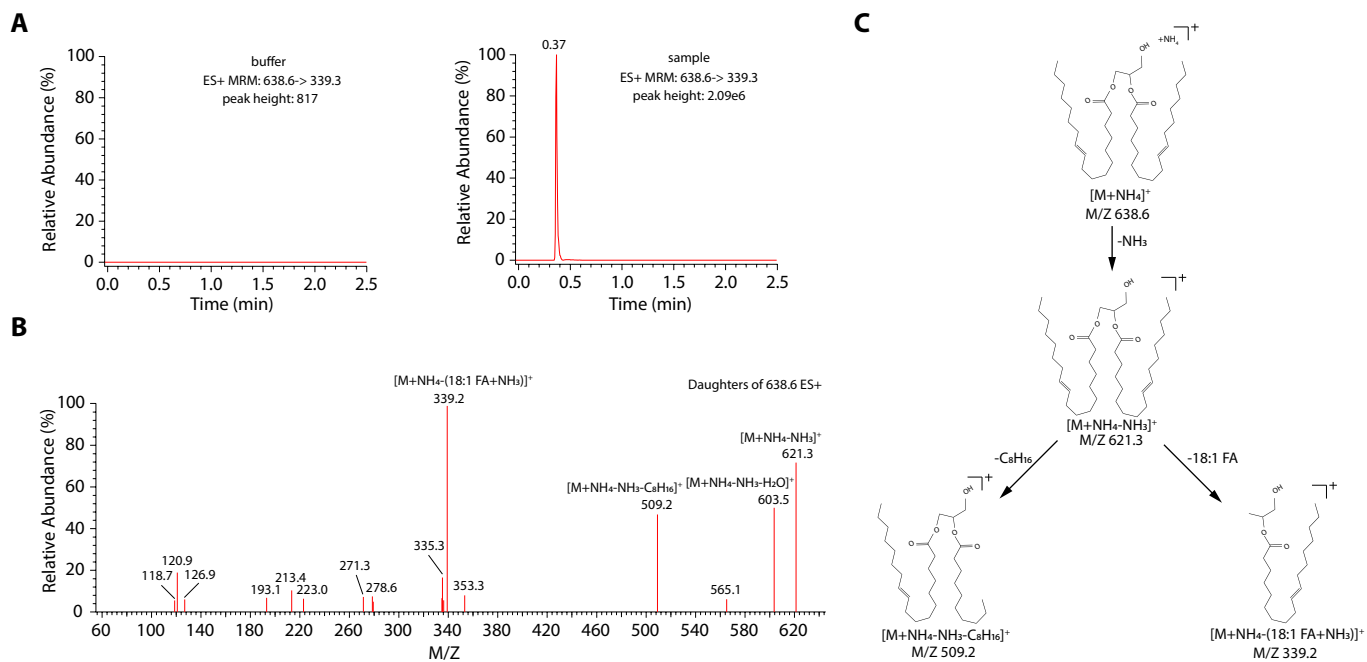

Supplement: supp [file elife-63429-supp-v1.zip]

Figure1-figure supplement 4

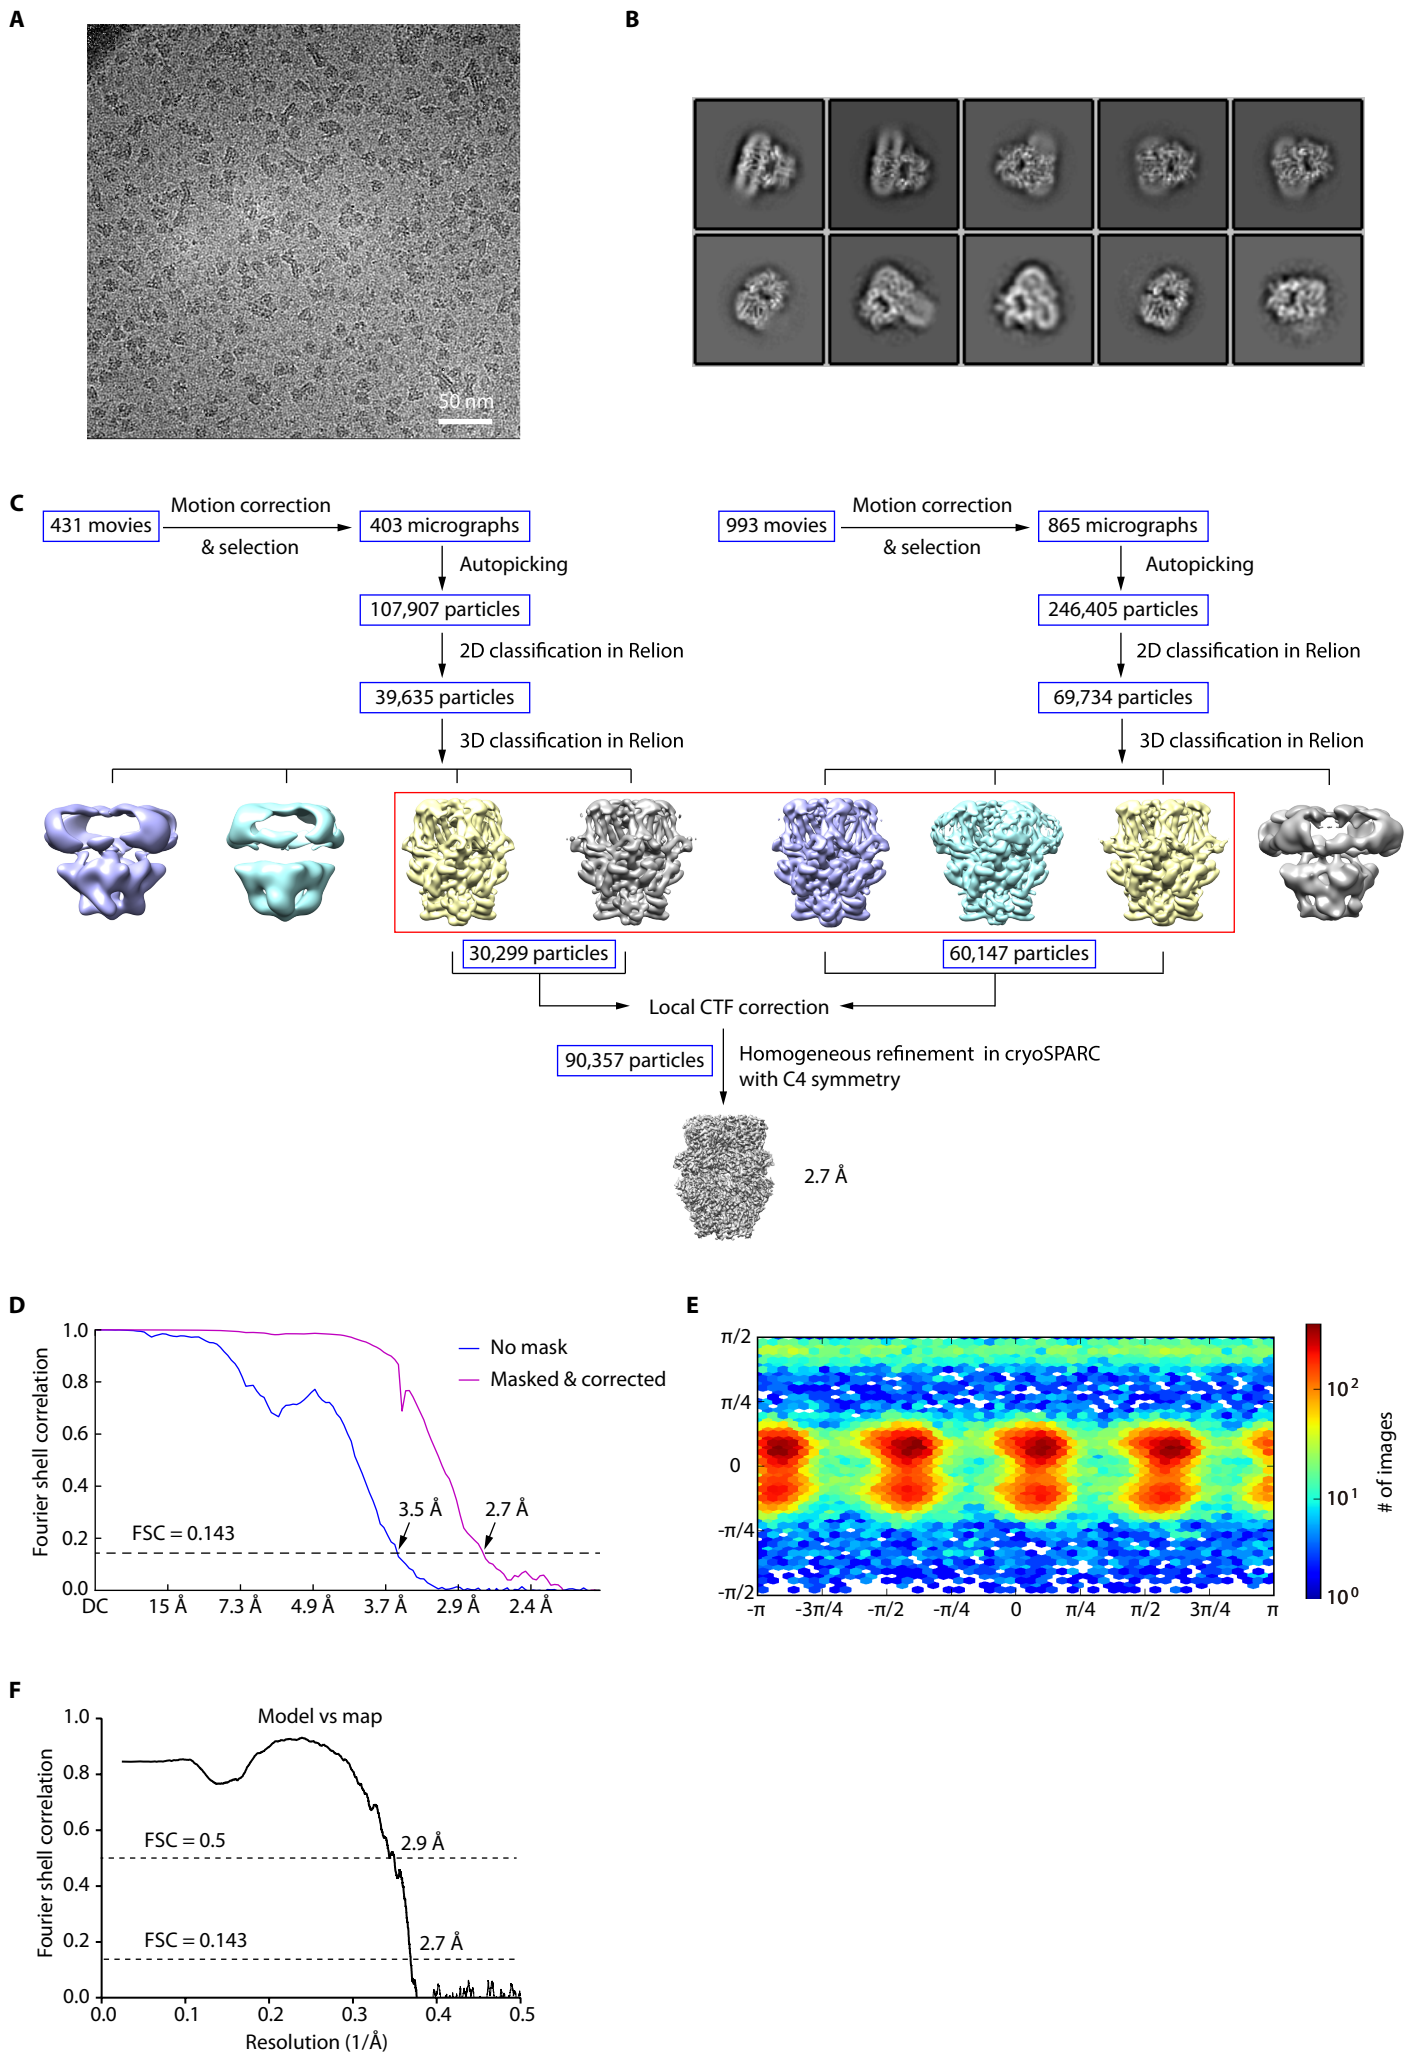

Supplement: supp [file elife-63429-supp-v1.zip]

Figure 2-figure supplement 1 continued

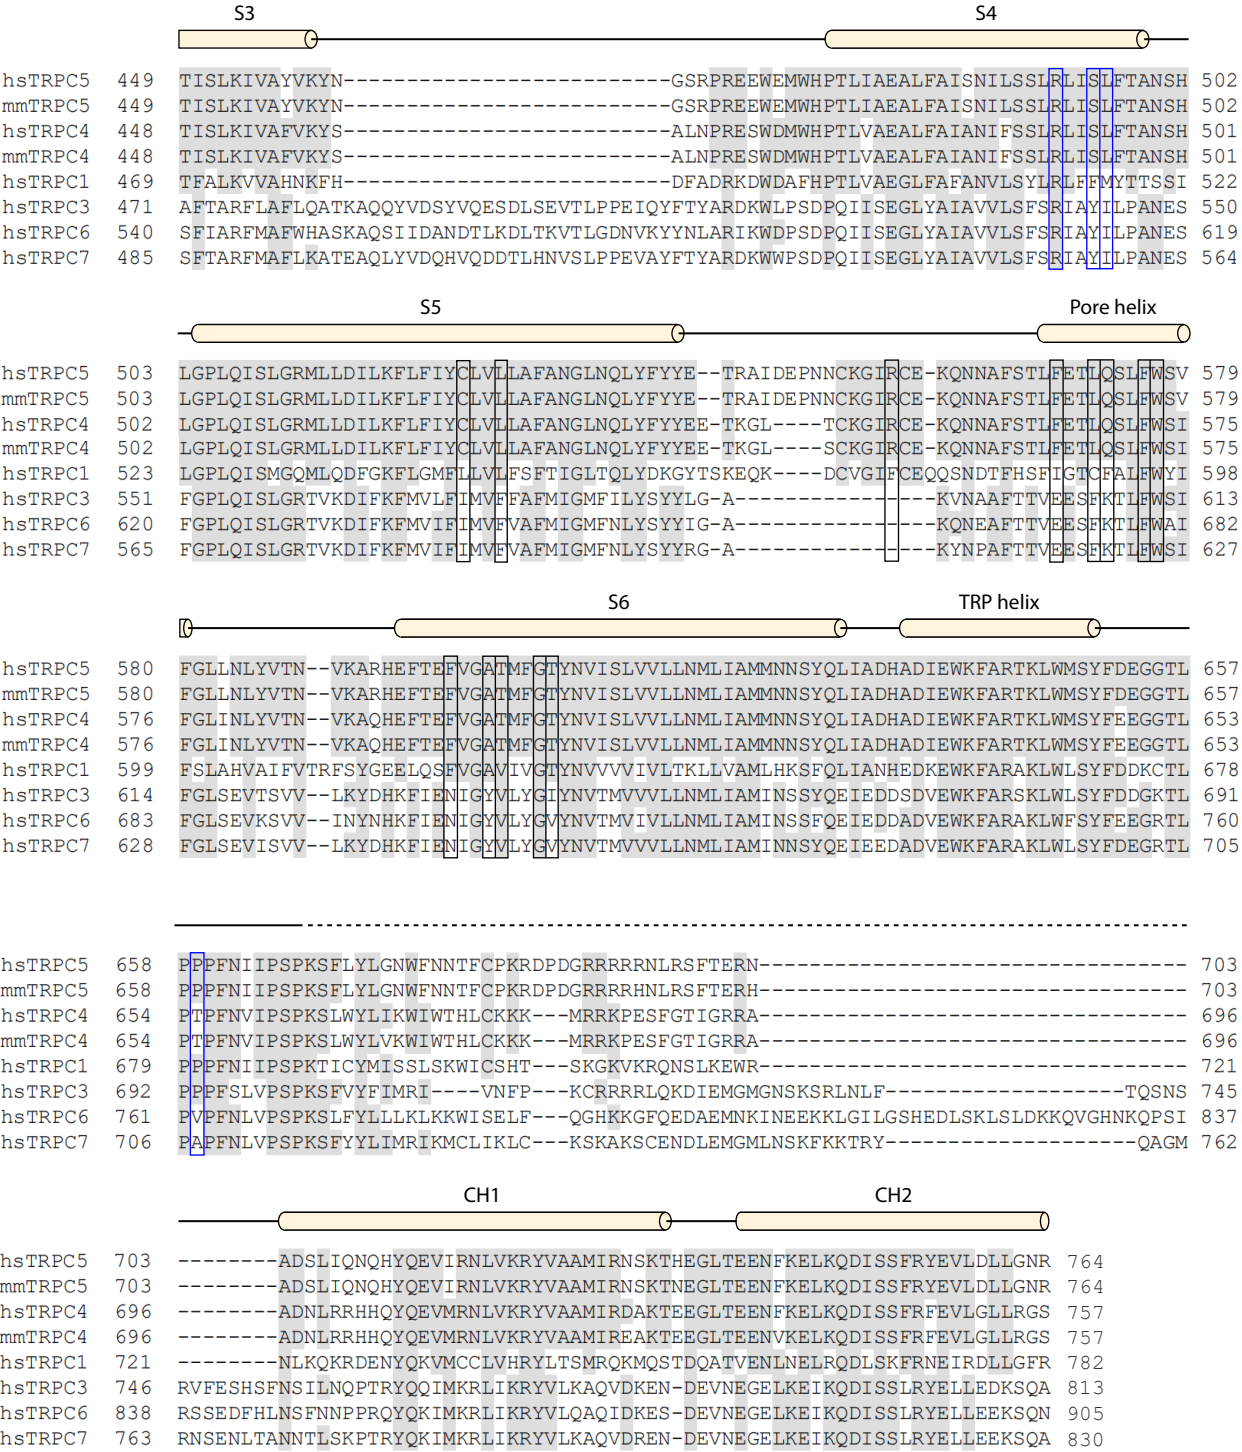

Supplement: supp [file elife-63429-supp-v1.zip]

Figure 6-figure supplement 2

**A**

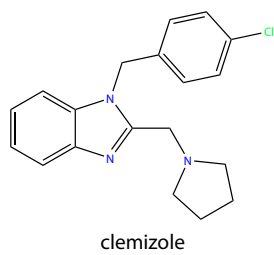

**B**

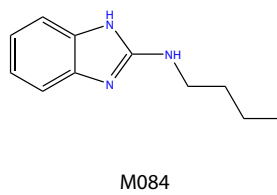

**C**

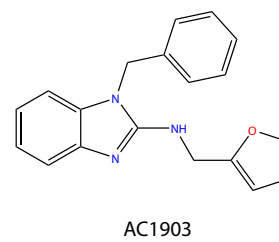

**D**

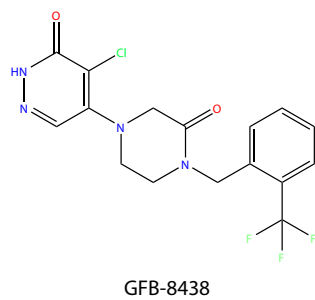

**E**

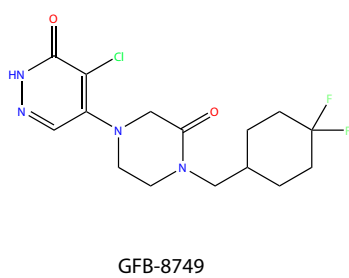

**F**

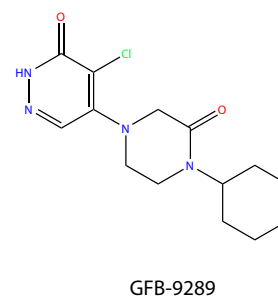

**G**

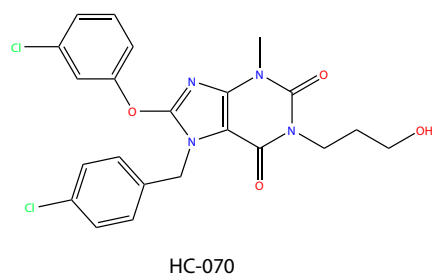

**H**

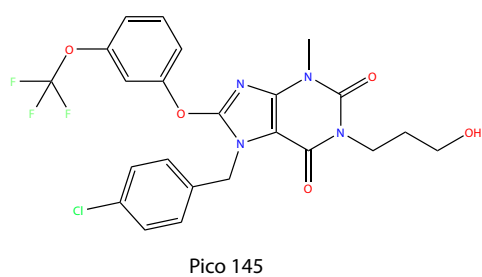

**I**

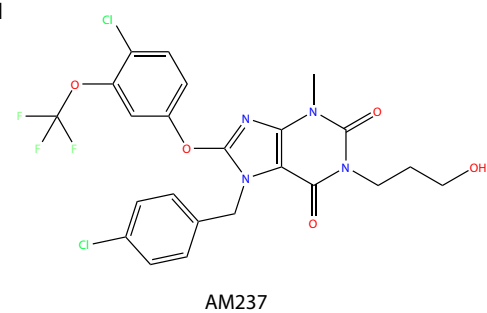

Supplement: supp [file elife-63429-supp-v1.zip]

Figure1-figure supplement 3

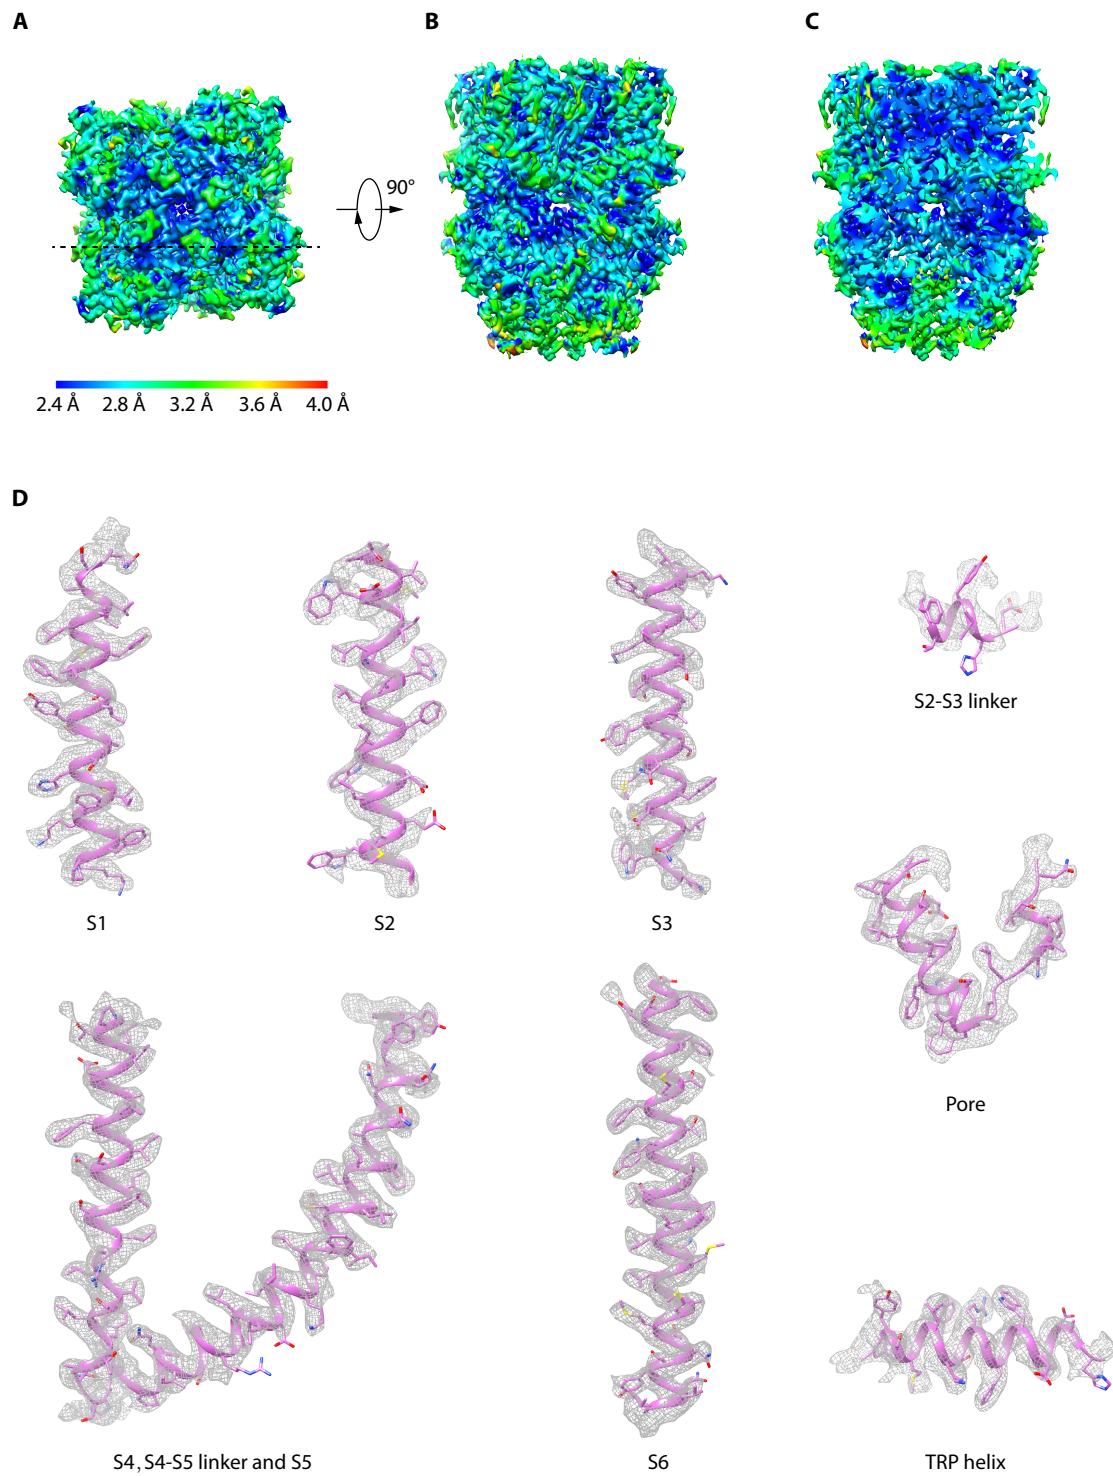

Supplement: supp [file elife-63429-supp-v1.zip]

Figure 1-figure supplement 7

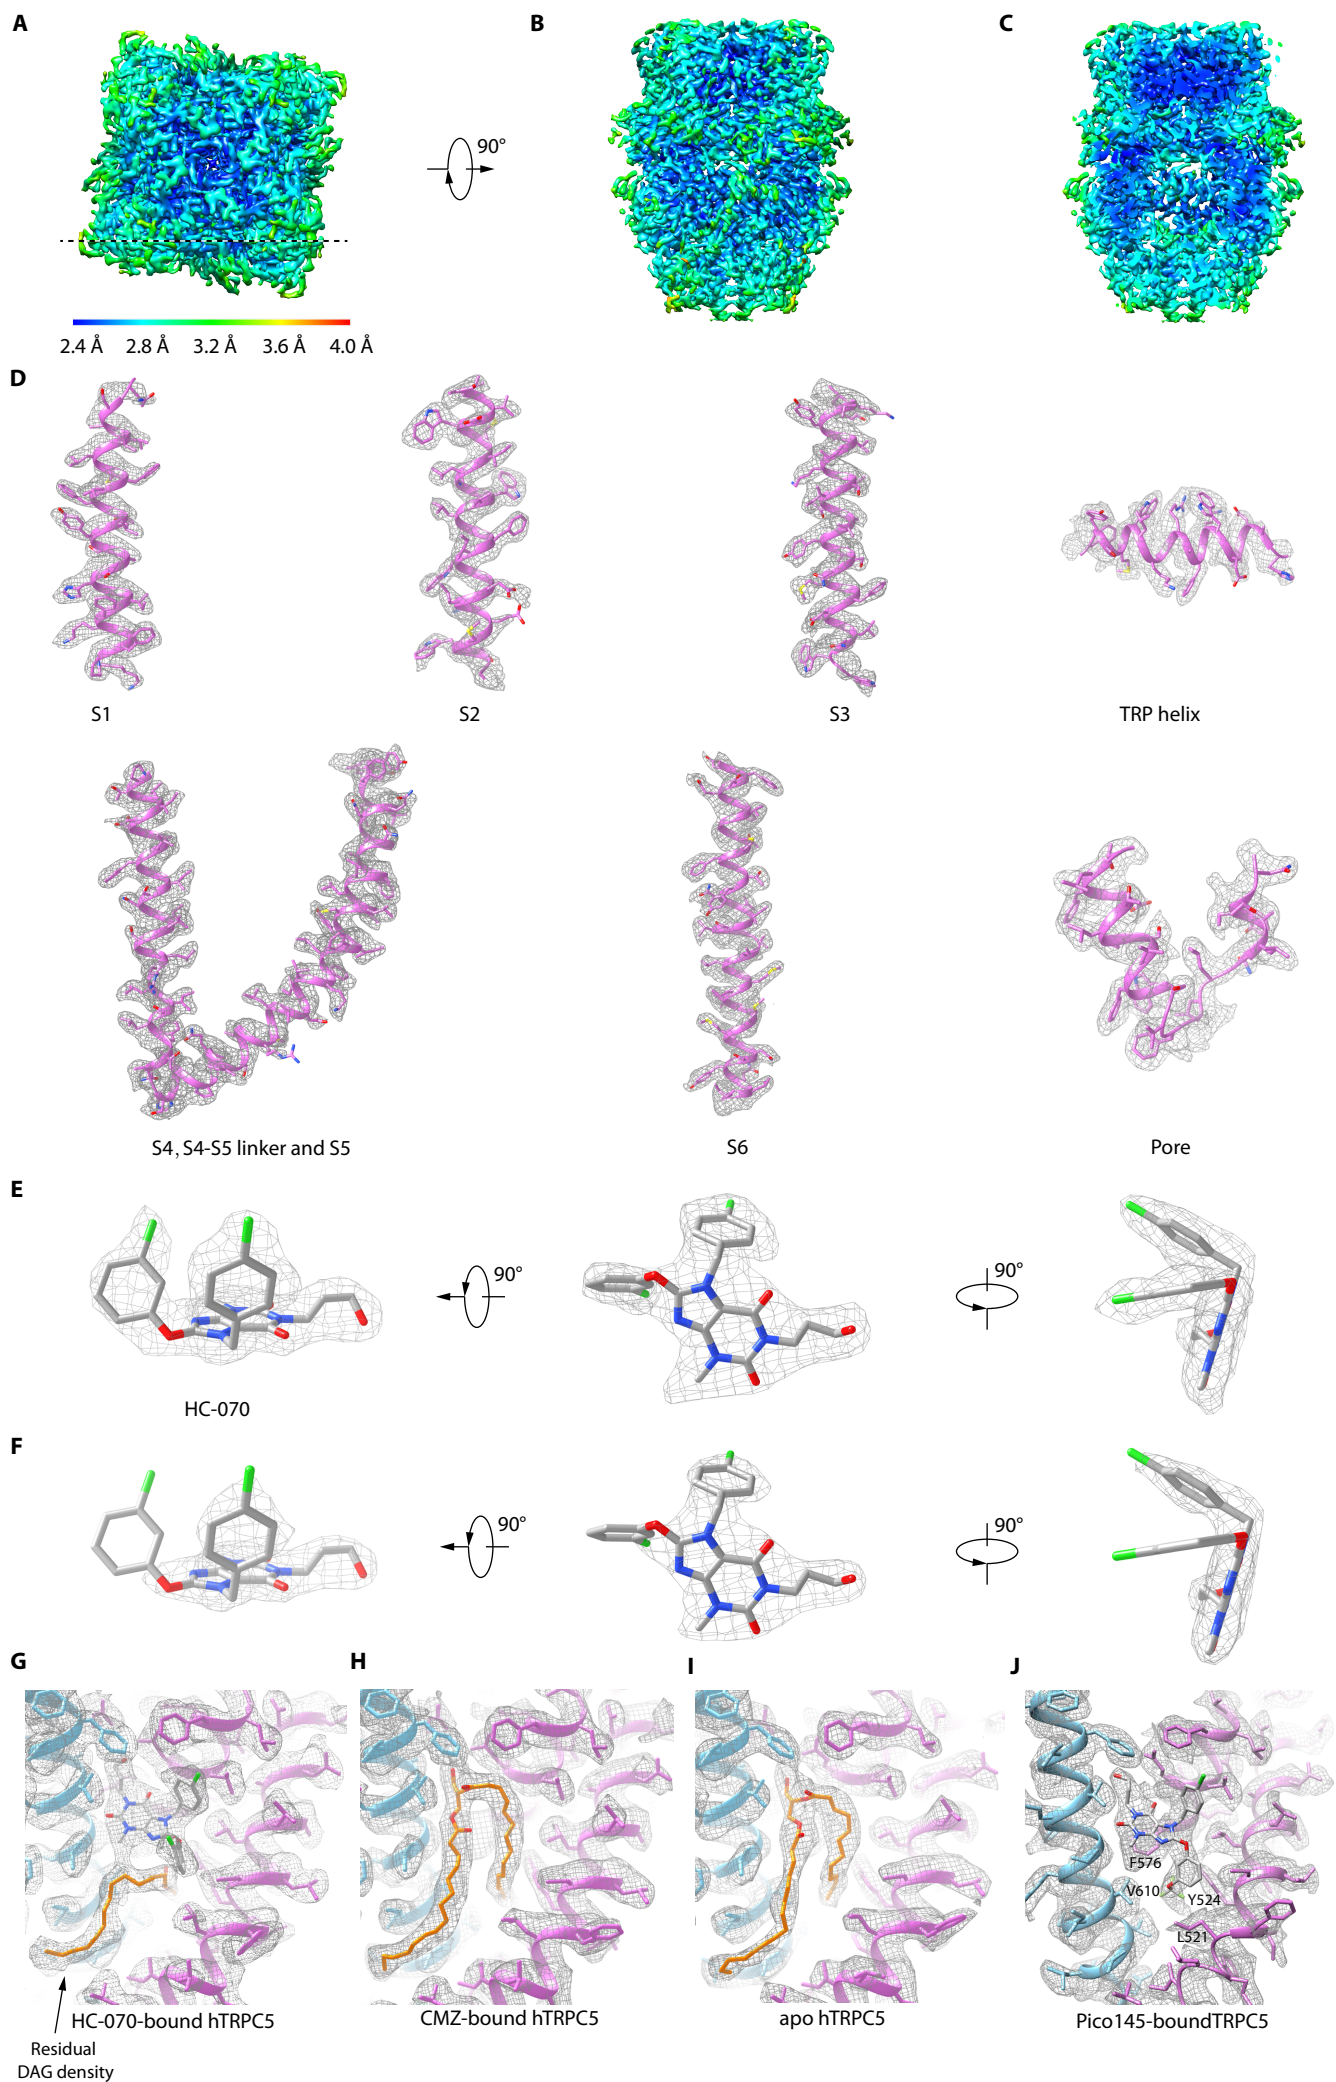

Supplement: supp [file elife-63429-supp-v1.zip]

Figure 1-figure supplement 5

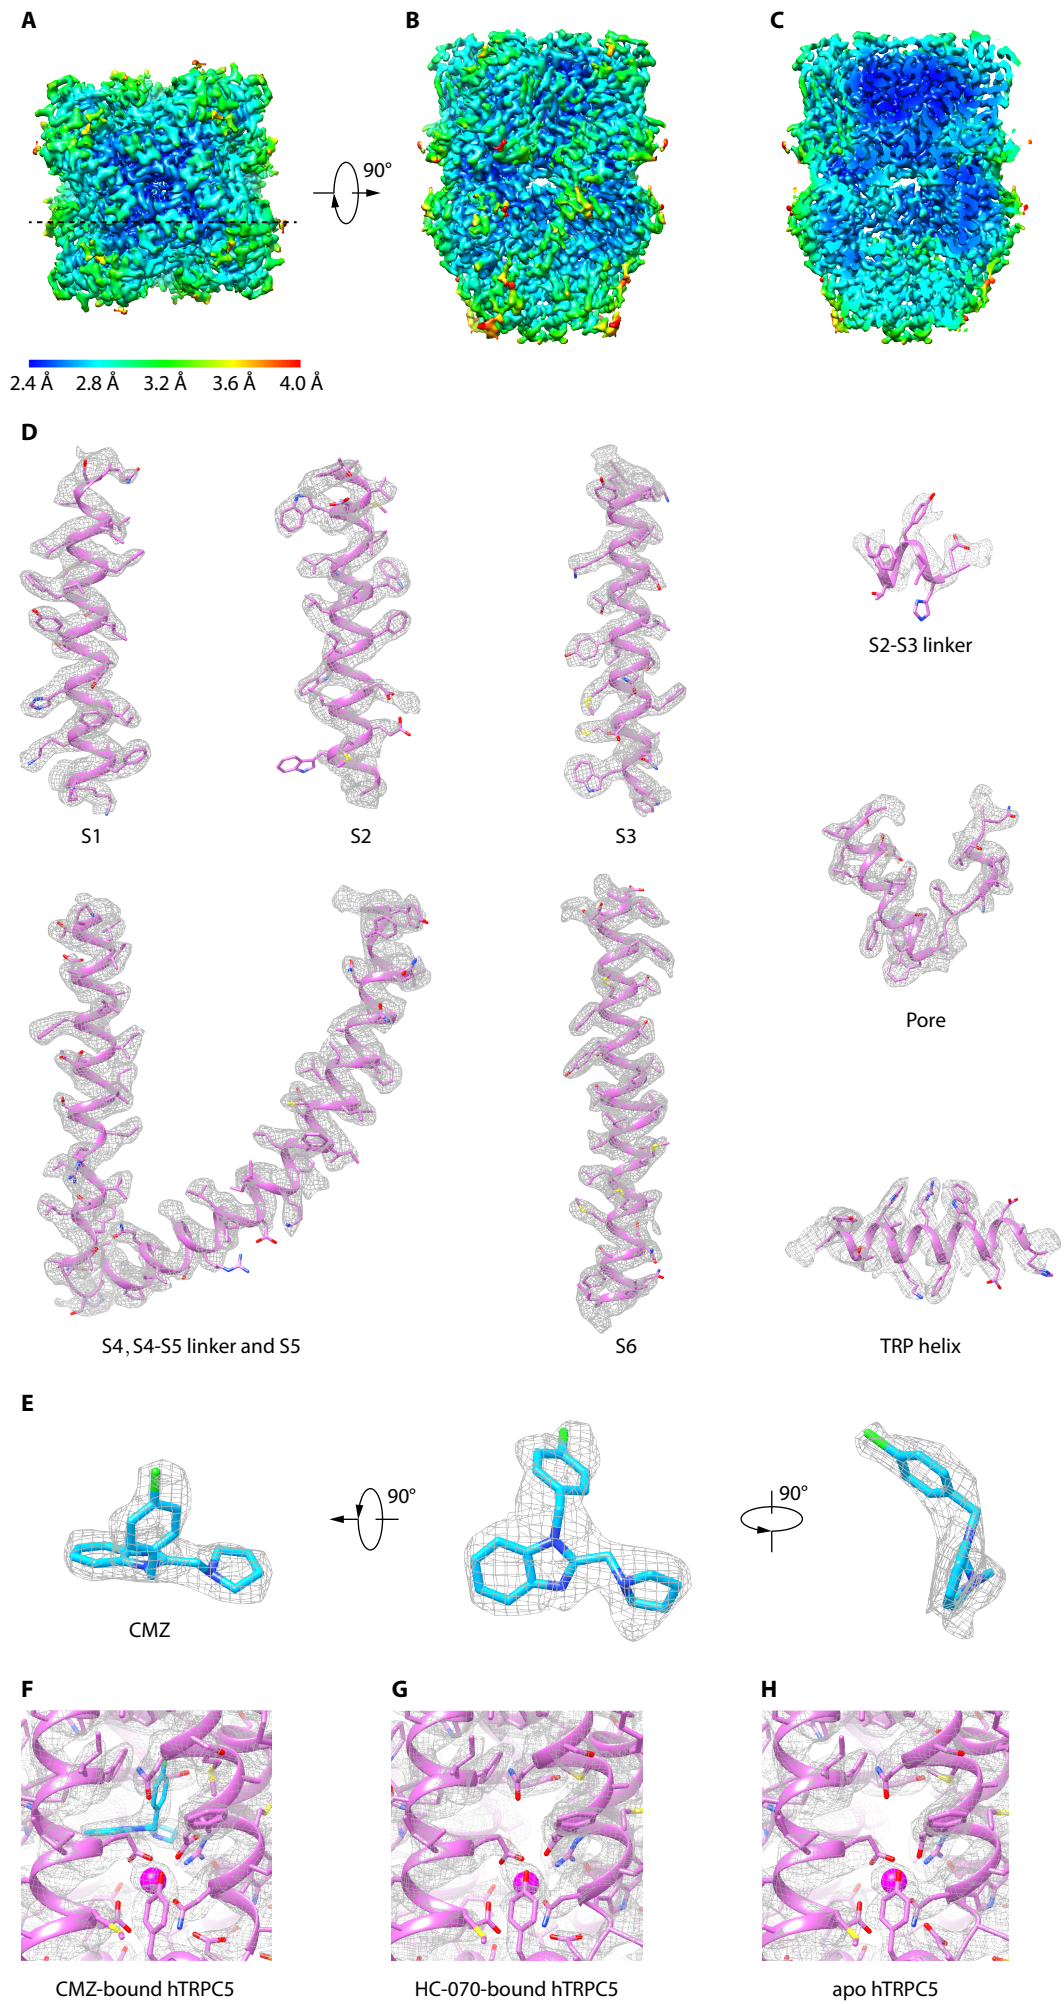

Supplement: supp [file elife-63429-supp-v1.zip]

Figure 1-figure supplement 6

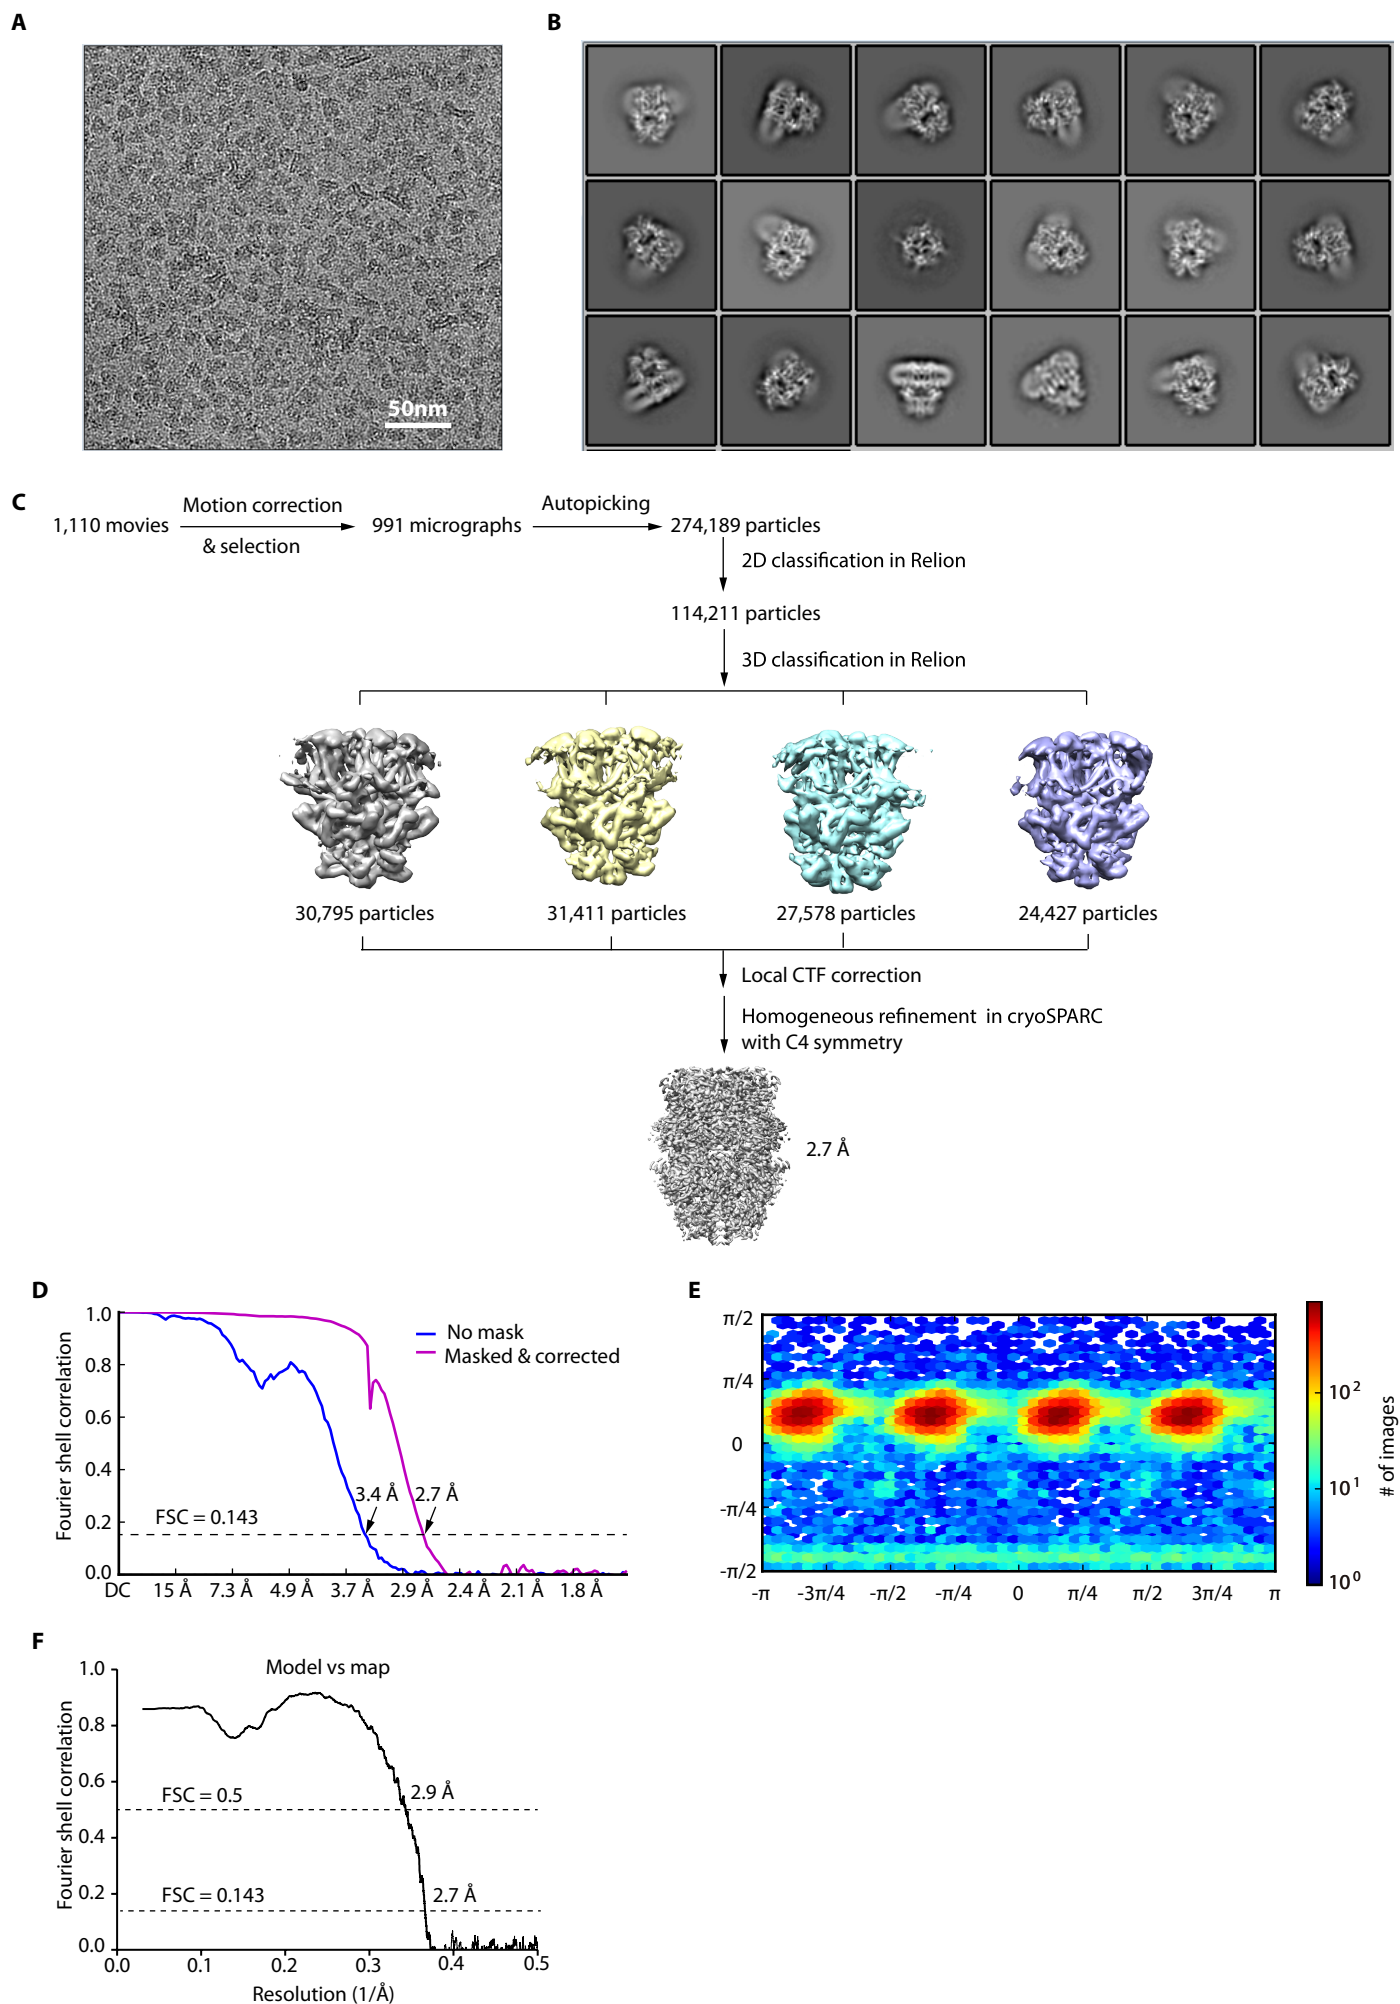

Supplement: supp [file elife-63429-supp-v1.zip]

Figure 4-figure supplement 2

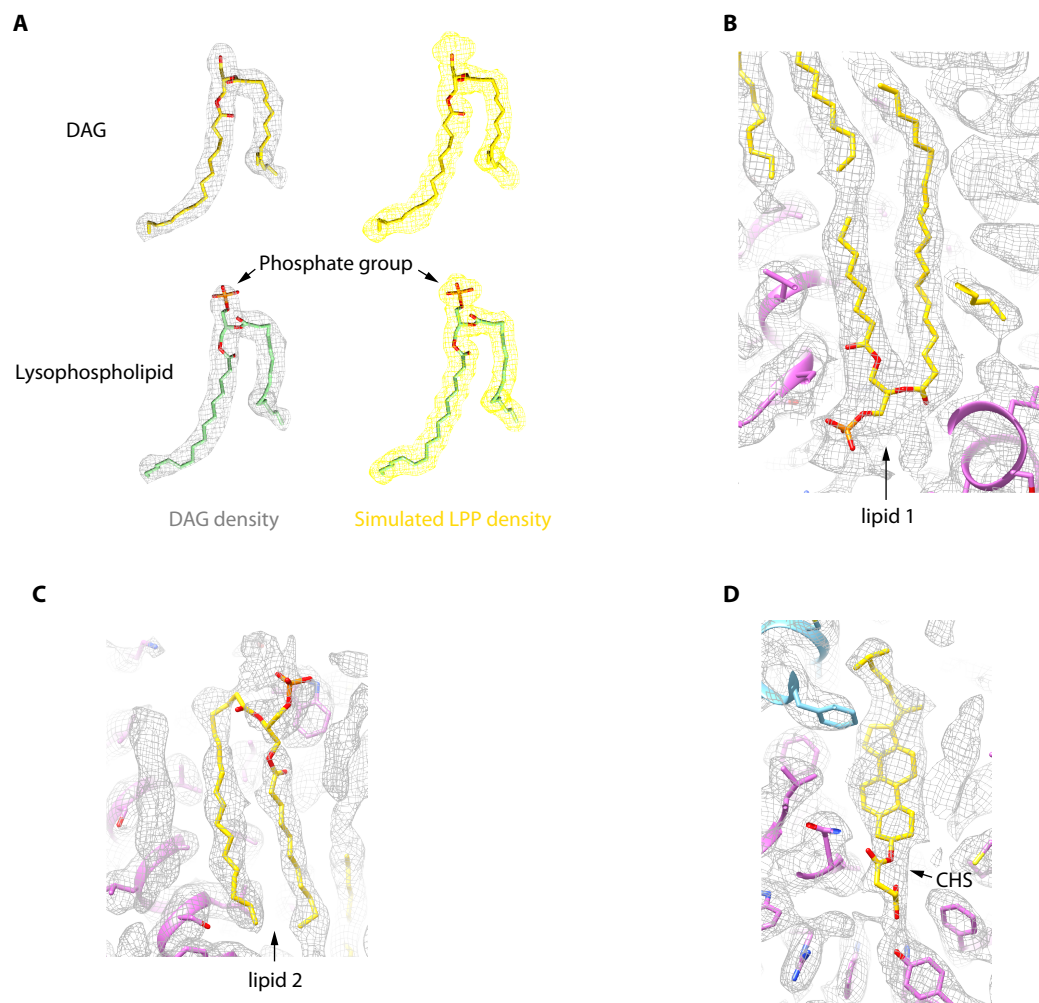

Supplement: supp [file elife-63429-supp-v1.zip]

Figure 2-figure supplement 2

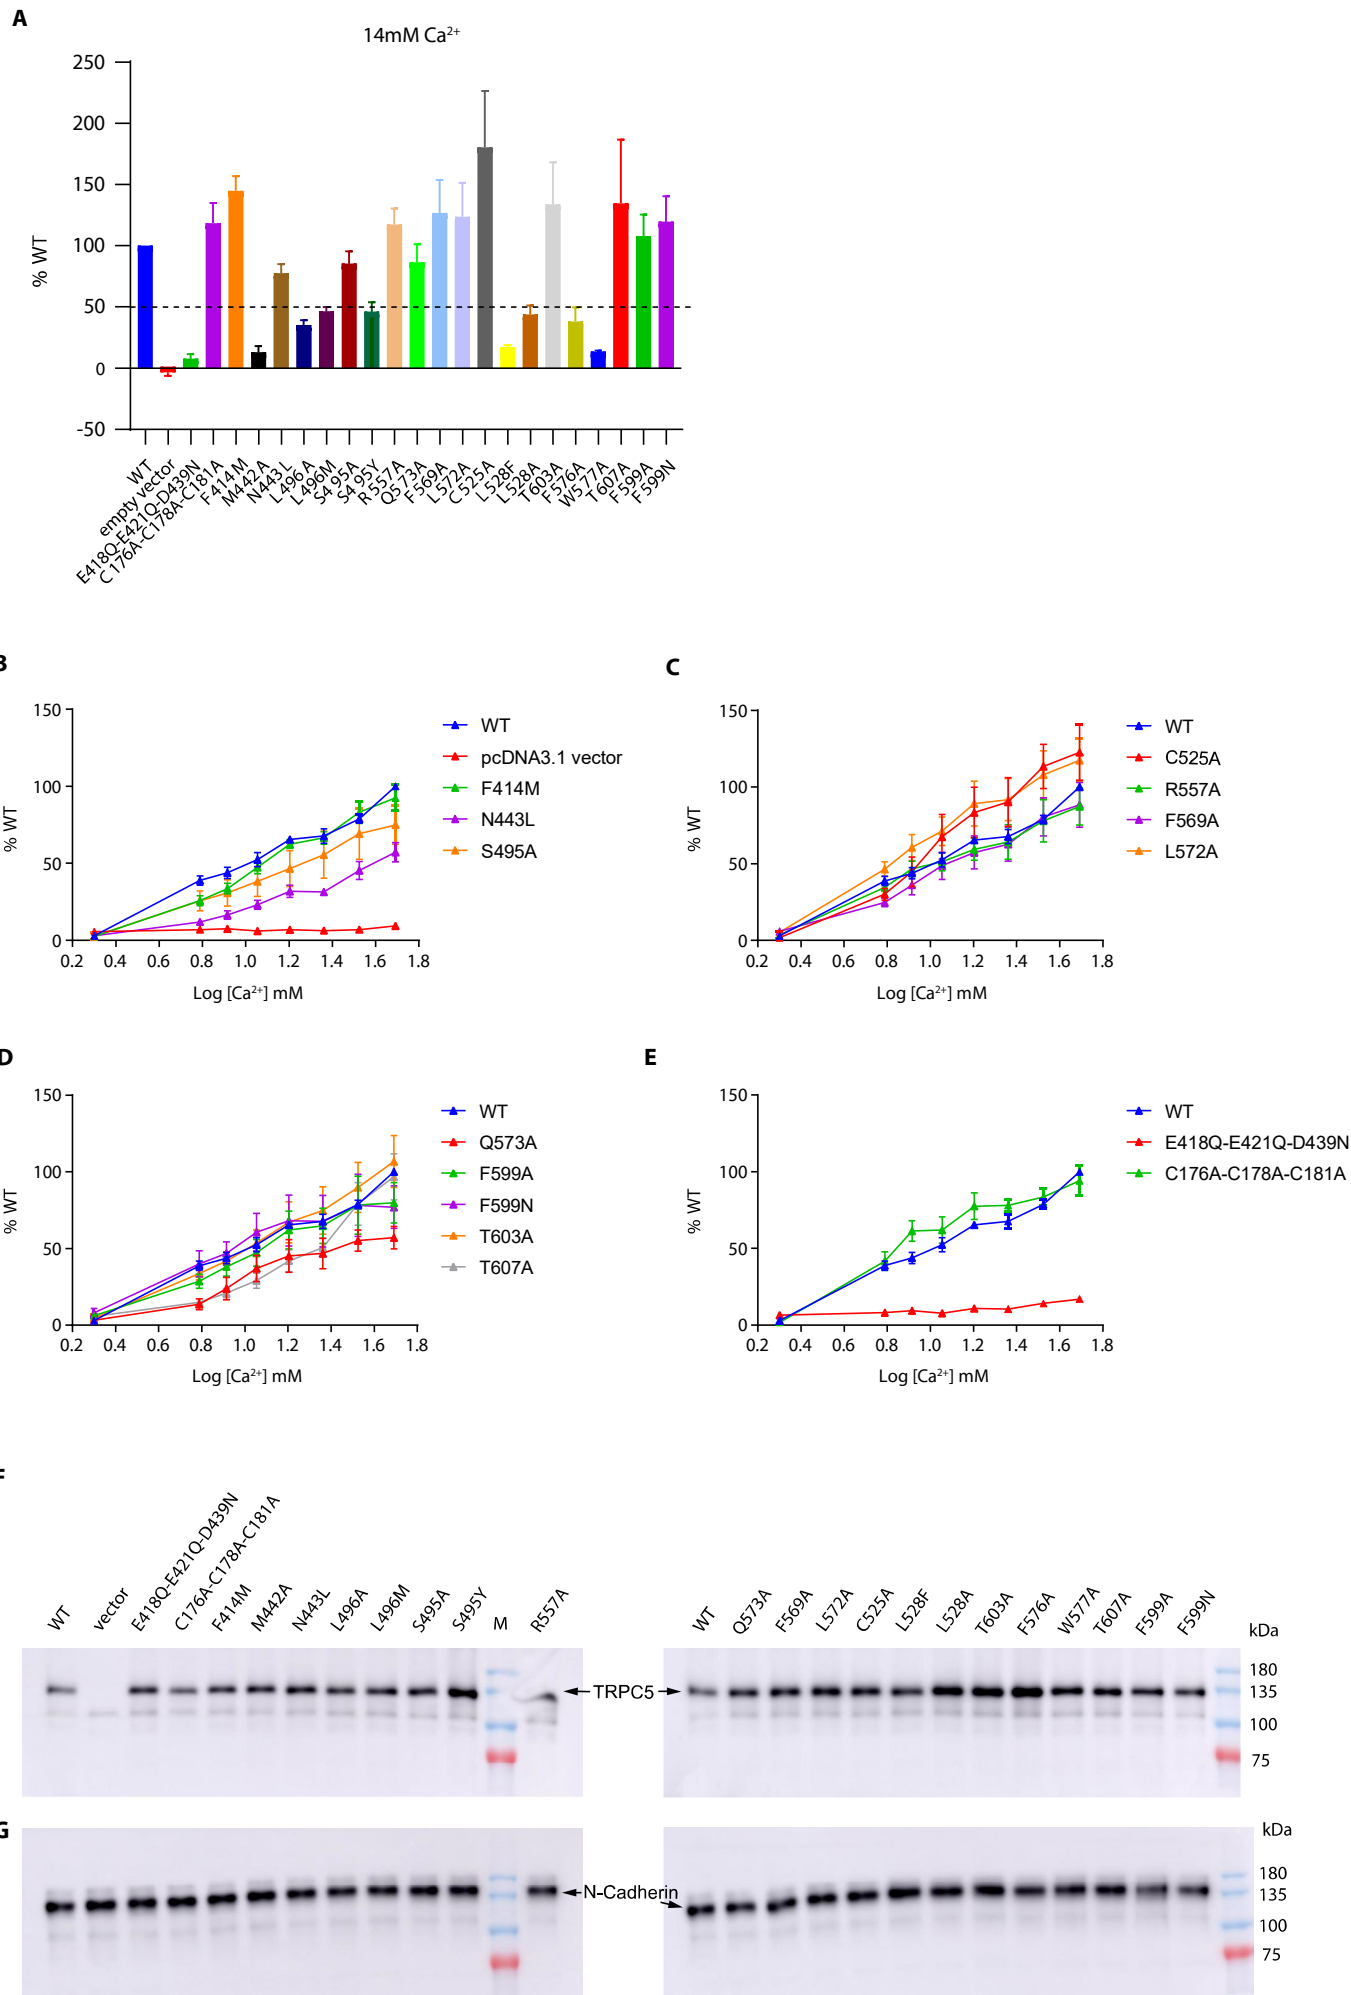

Supplement: supp [file elife-63429-supp-v1.zip]

**Figure 1-figure supplement 1**

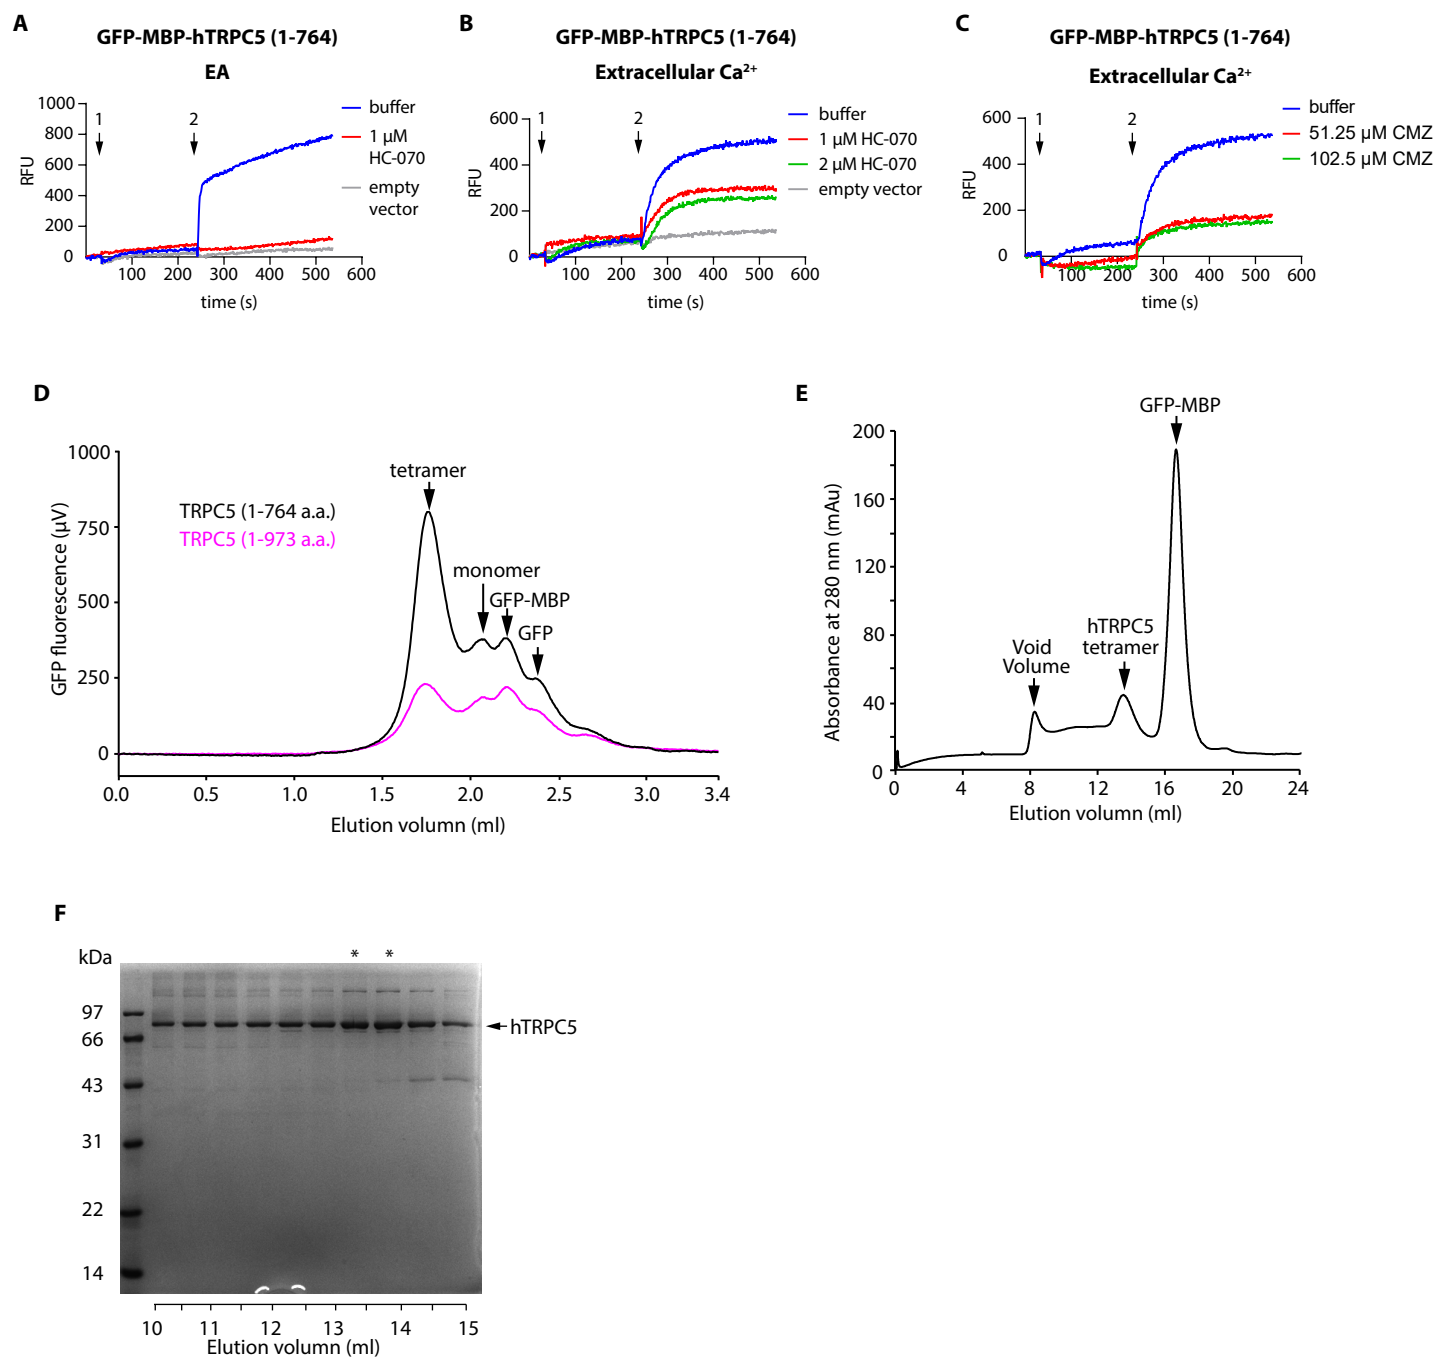

Supplement: supp [file elife-63429-supp-v1.zip]

Figure 6-figure supplement 1

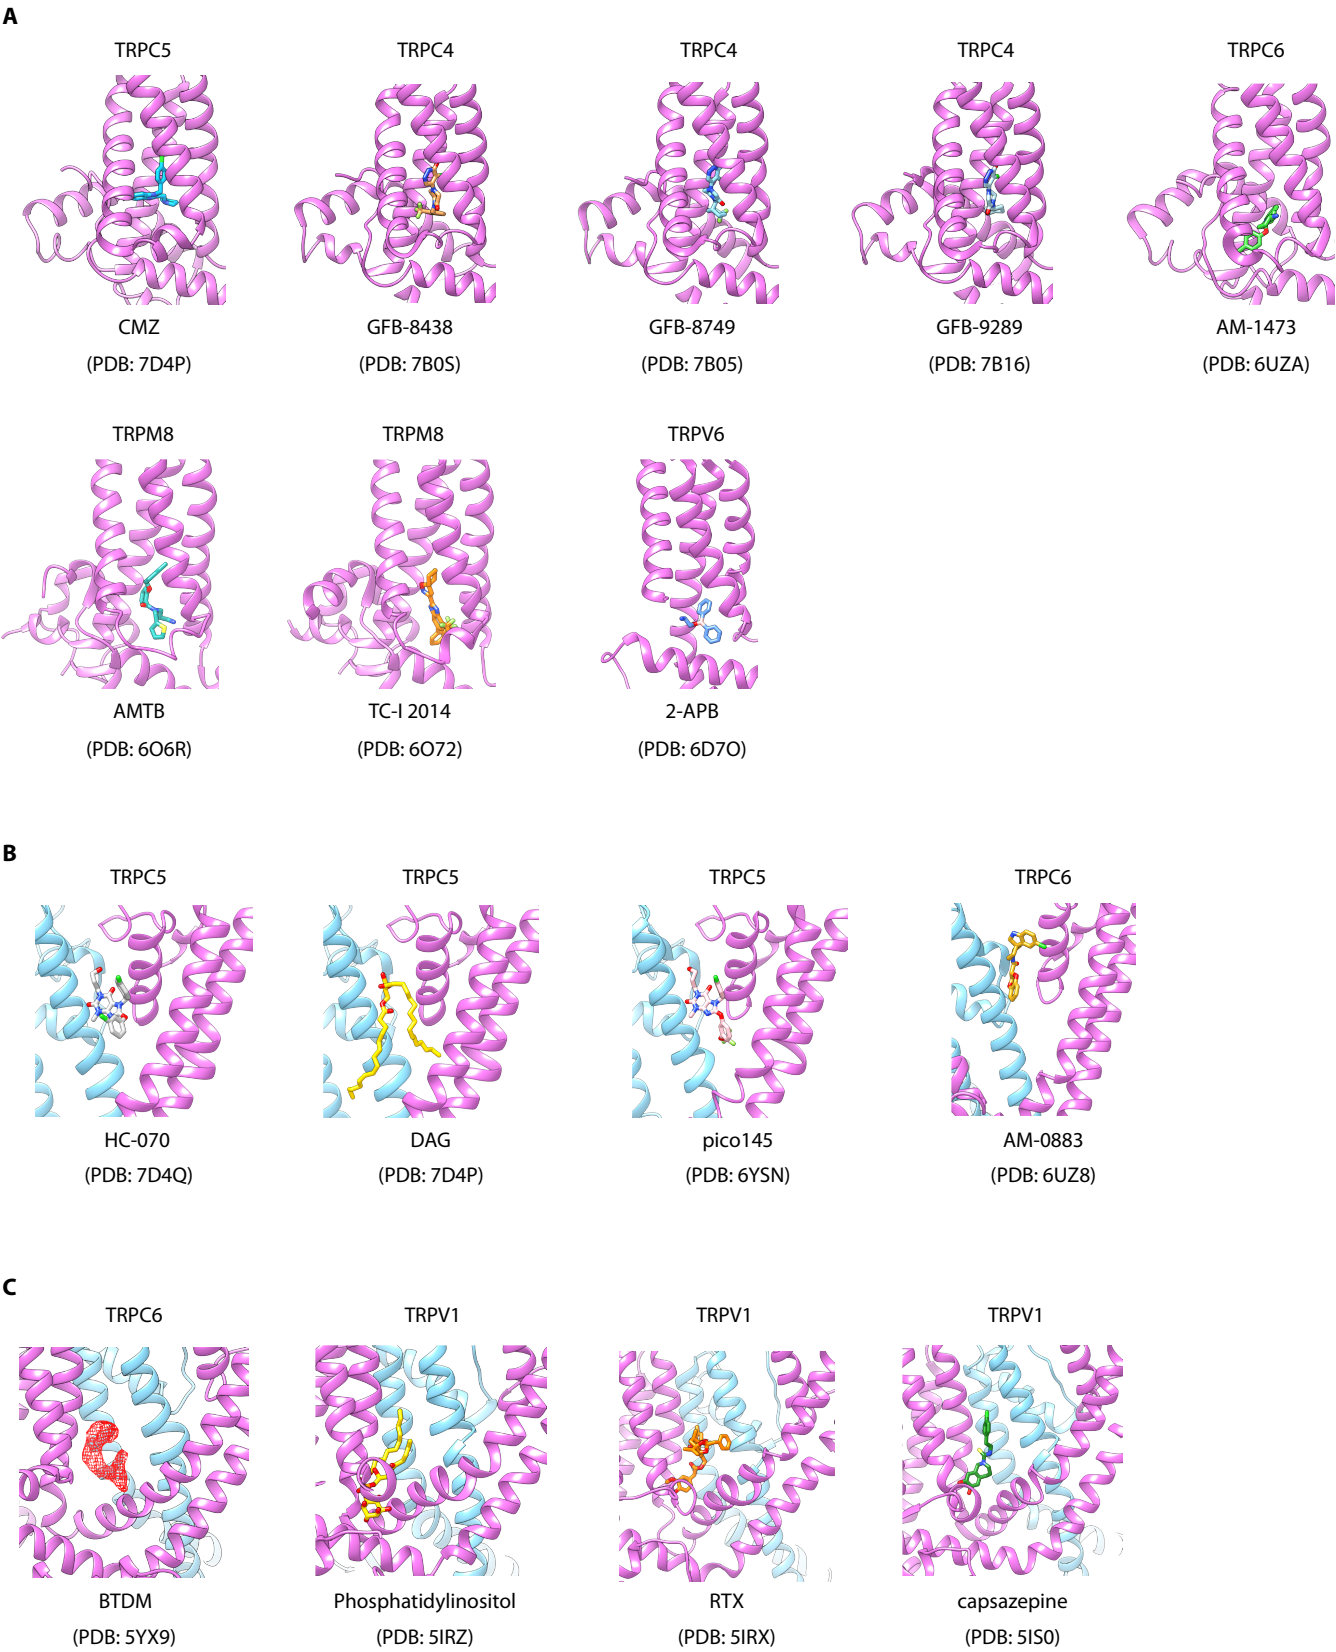

Supplement: supp [file elife-63429-supp-v1.zip]

**Figure1-figure supplement 2**

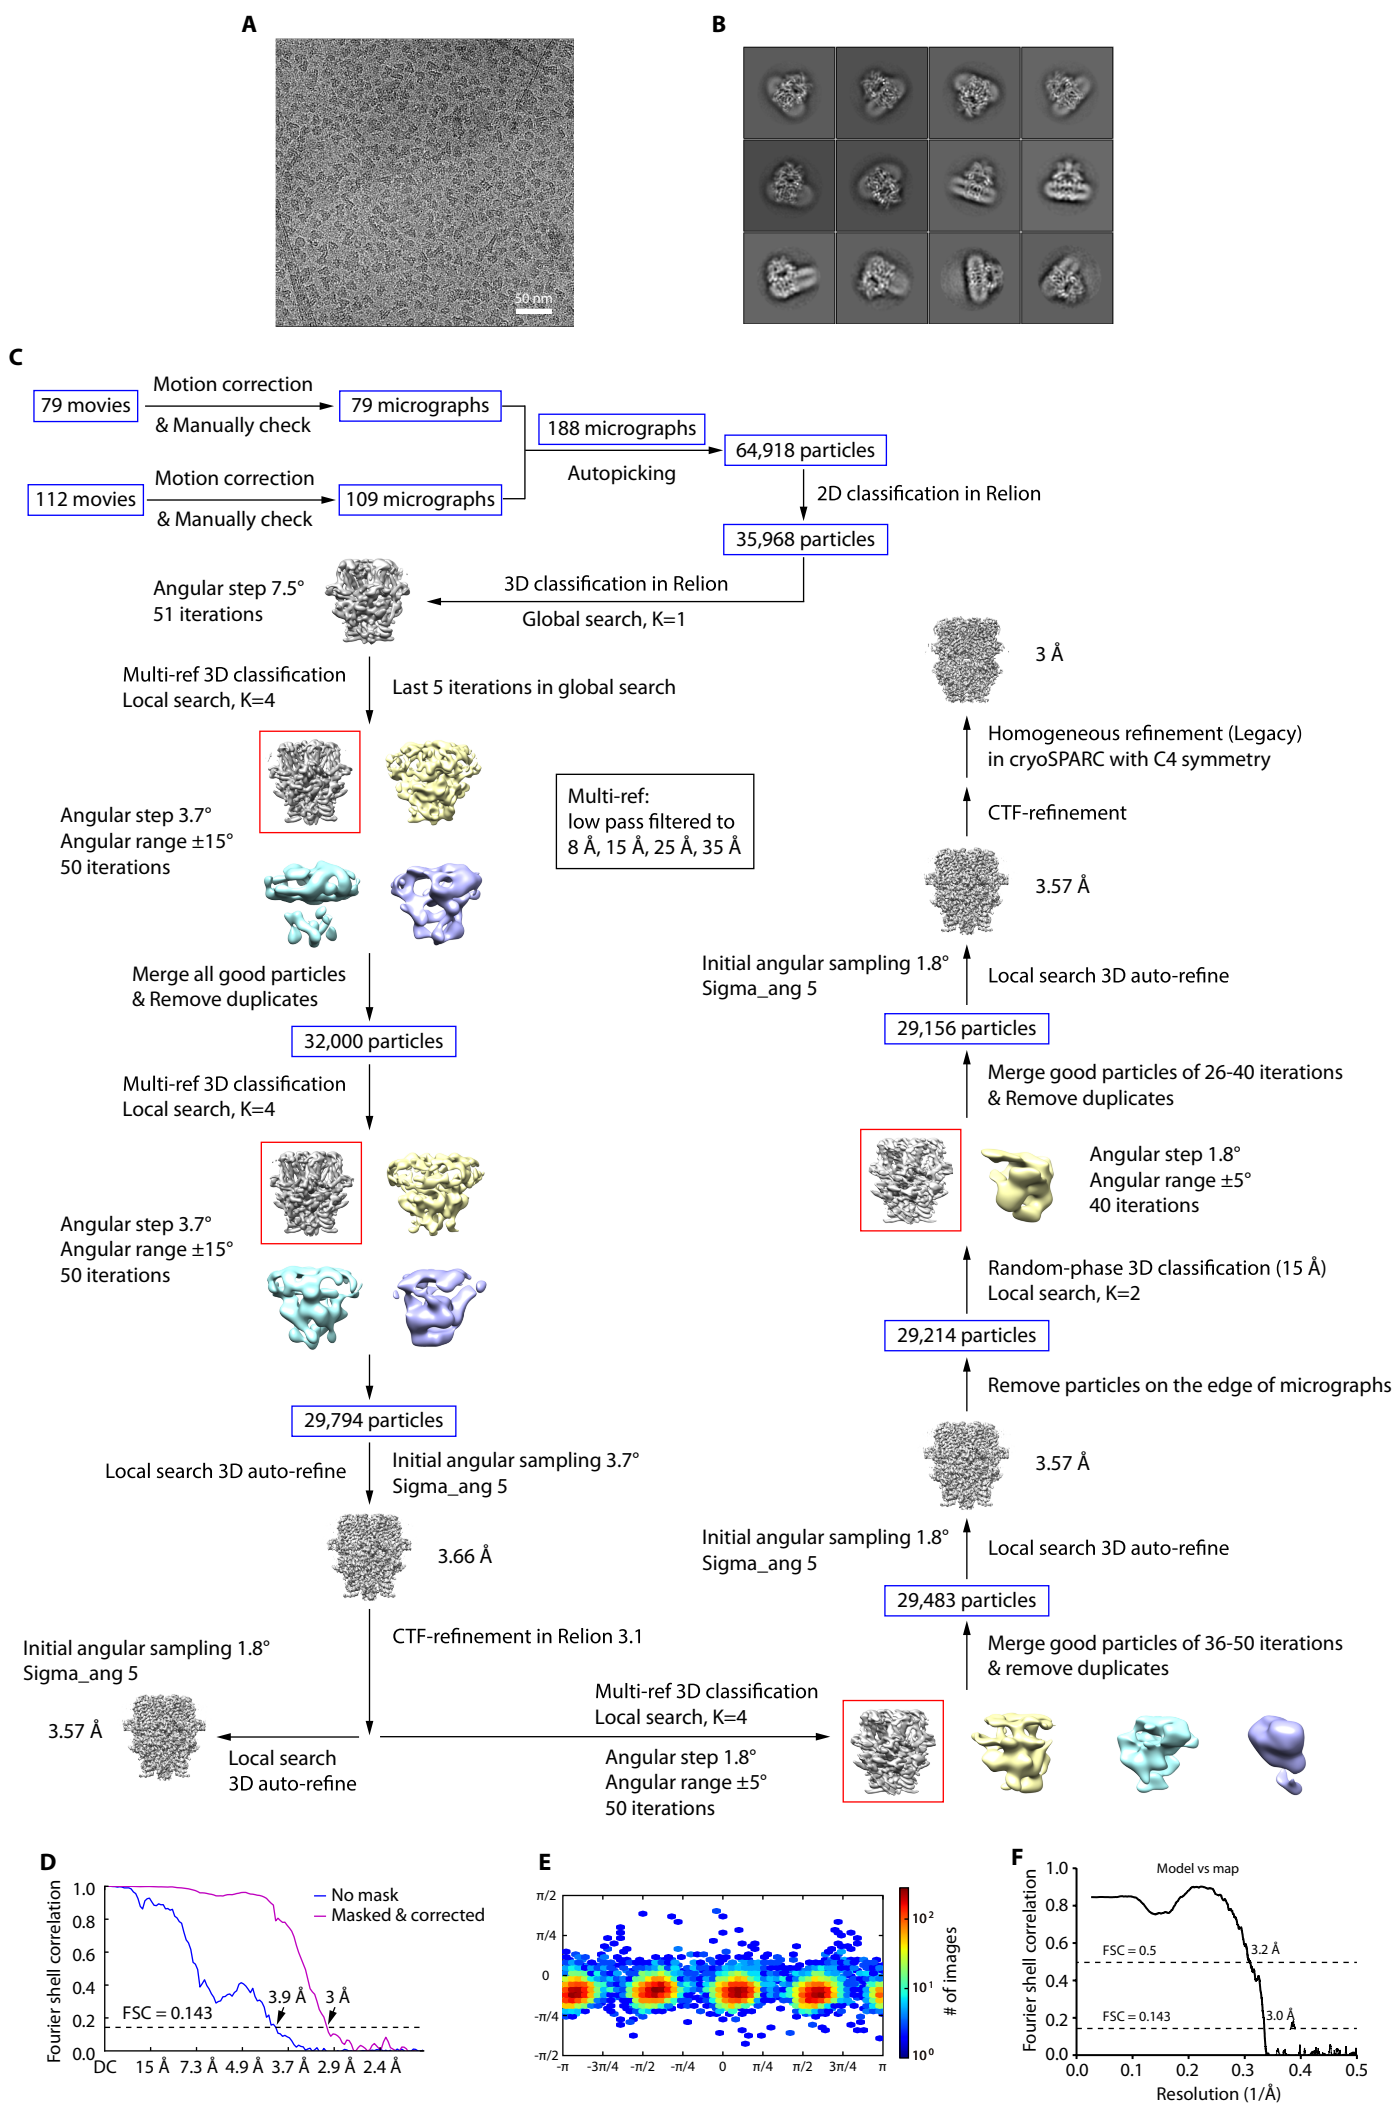

Supplement: supp [file elife-63429-supp-v1.zip]

Figure 2-figure supplement 1

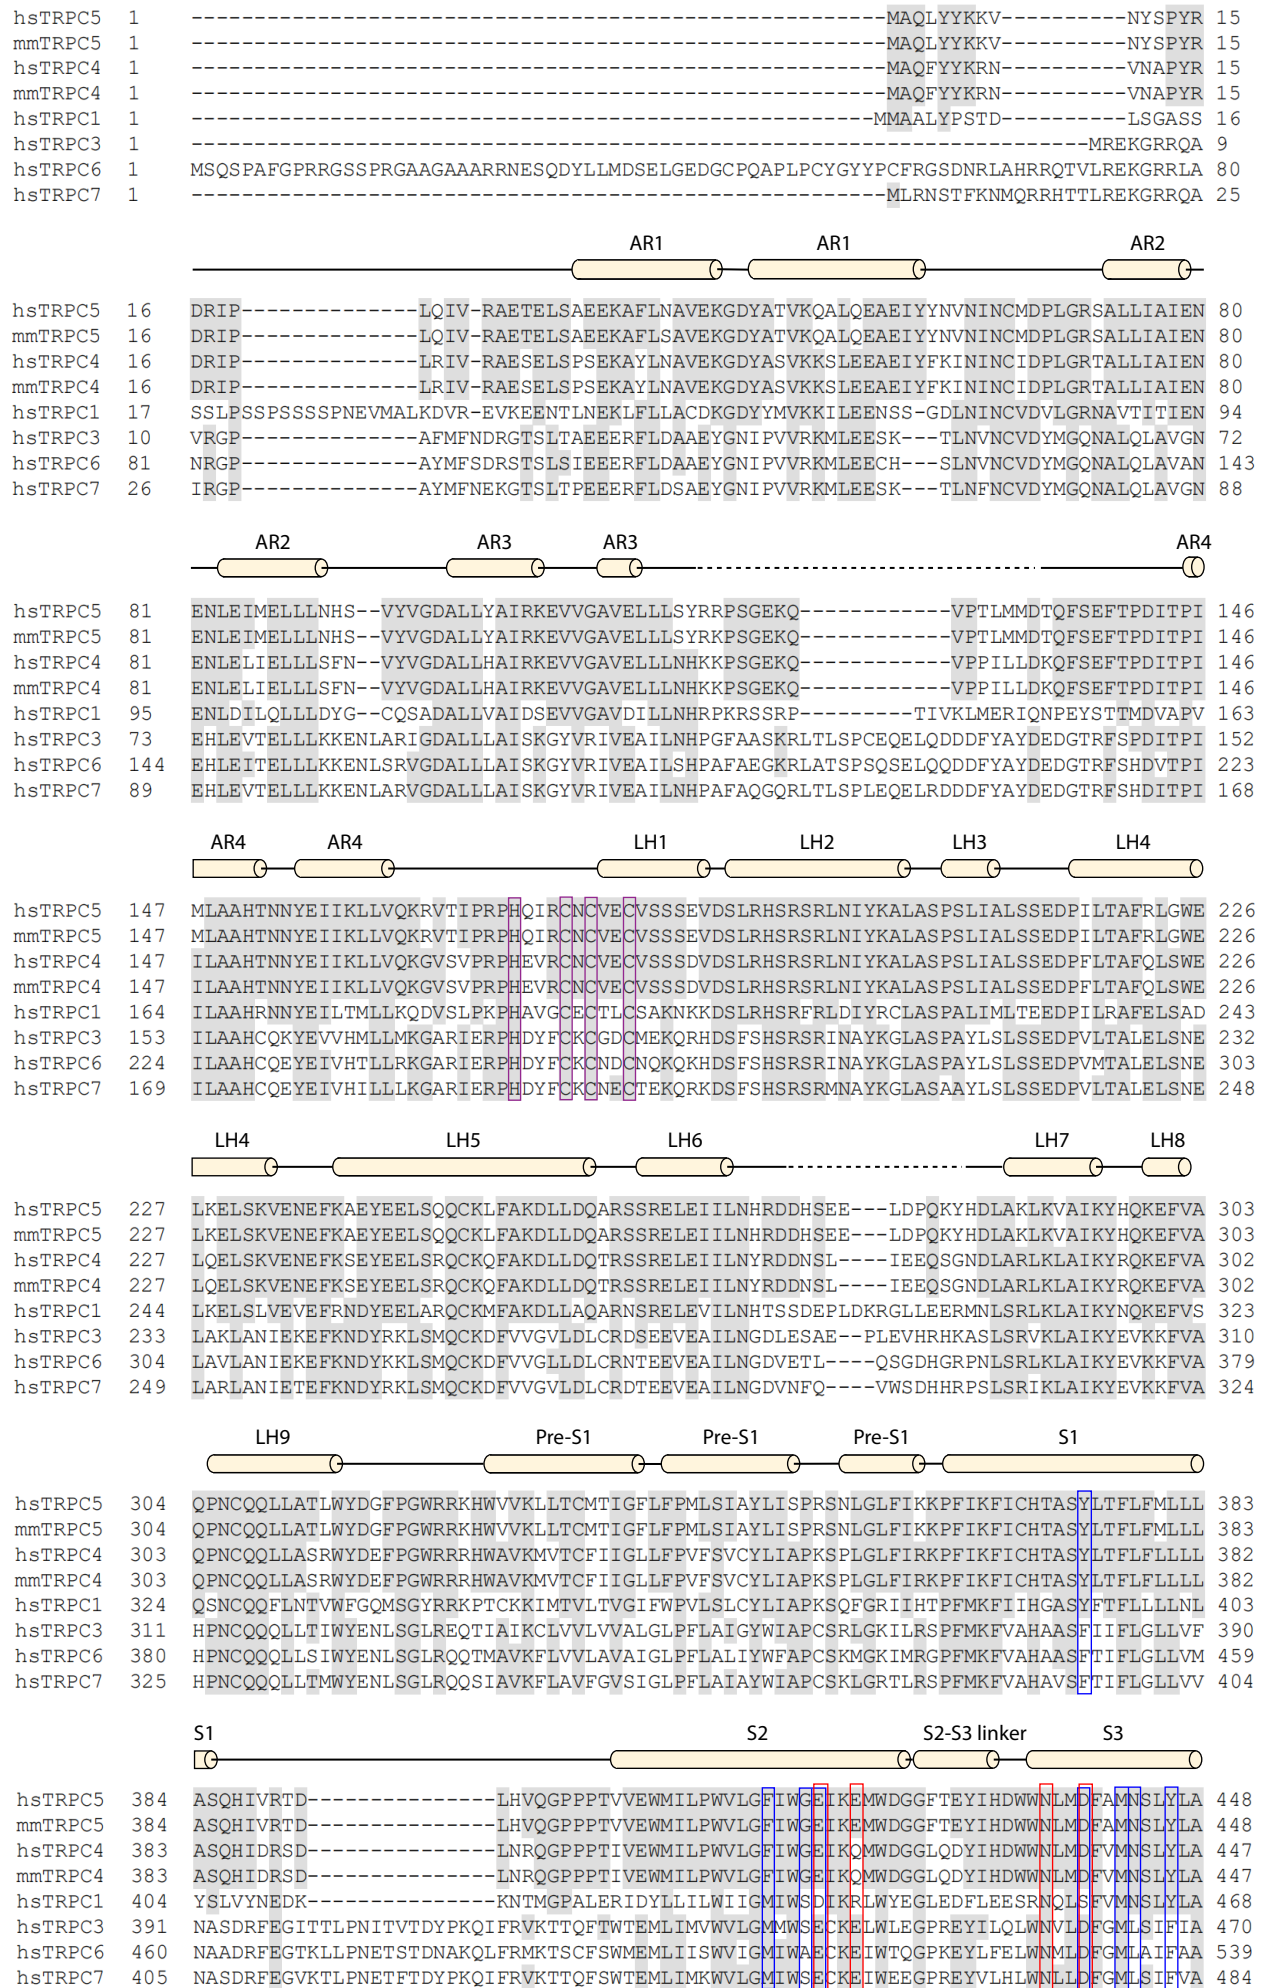

Supplement: supp [file elife-63429-supp-v1.zip]

Figure 4-figure supplement 1

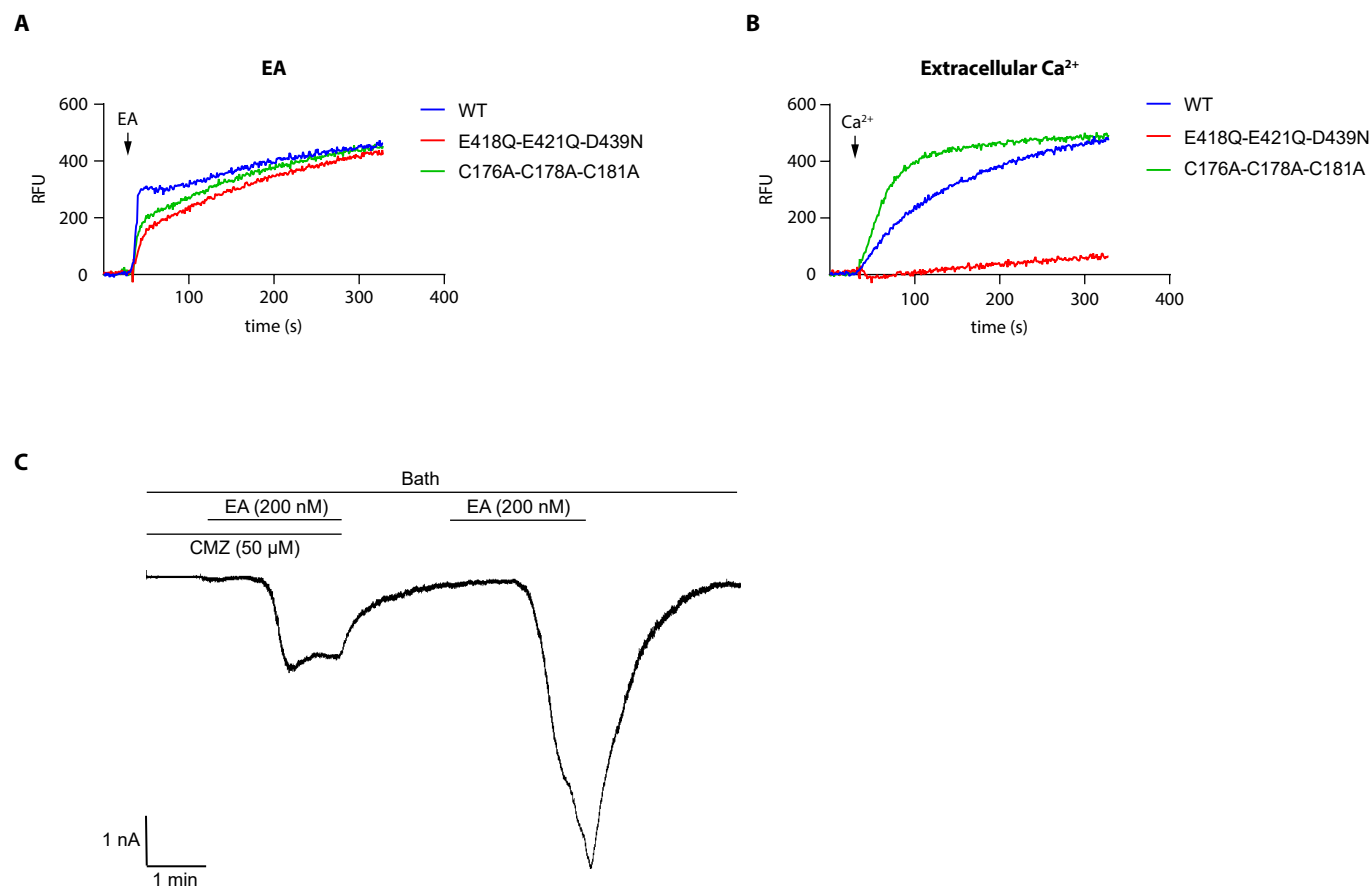

Supplement: supp [file elife-63429-supp-v1.zip]
